# Supplementary material for: The yeast mitophagy receptor Atg32 is ubiquitinated and degraded by the proteasome
Source: PubMed Central journal article supplement (PMC7757876; doi:10.1371/journal.pone.0241576), 2020-12-23
Supplement: pone.0241576.s007.pdf [file pone.0241576.s007.pdf]

**Figure S7**

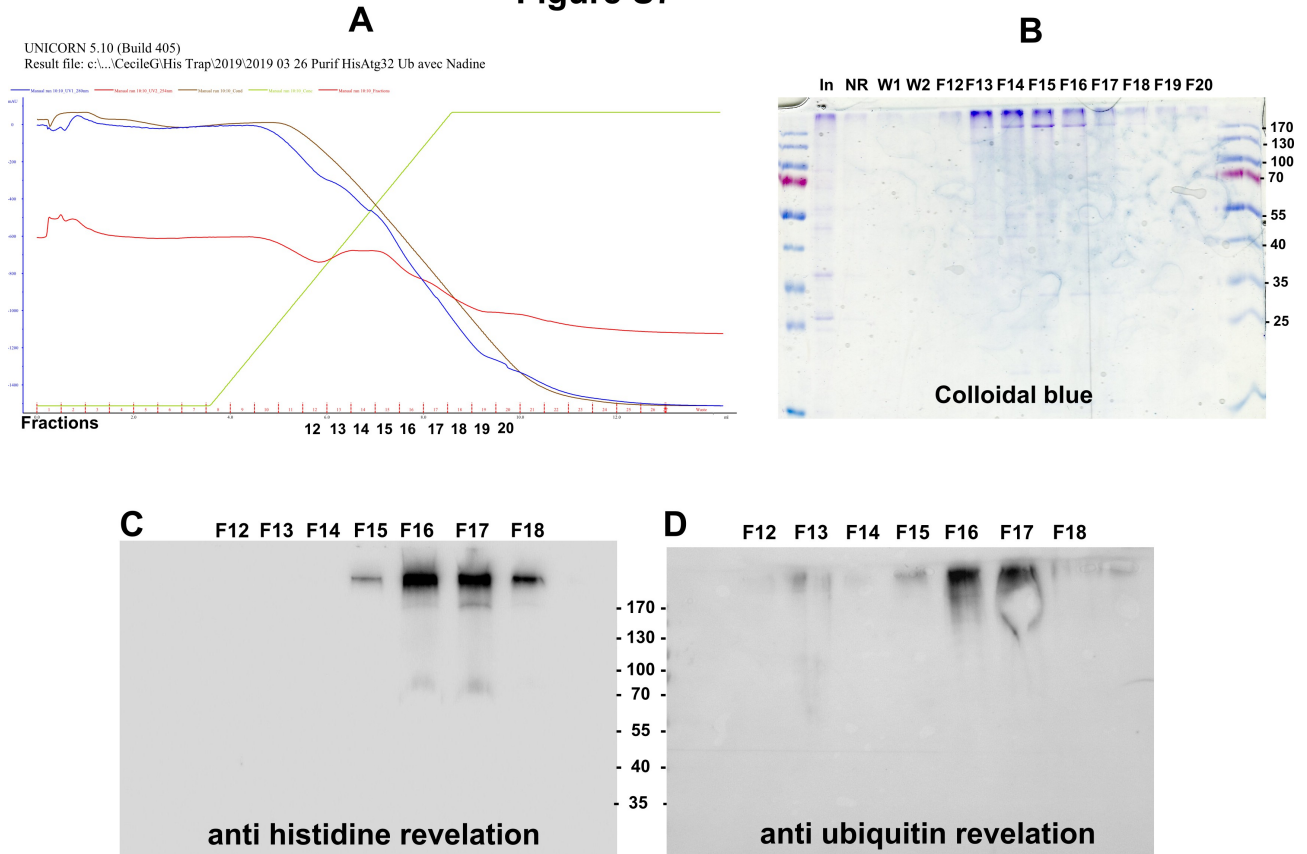

**Figure S7: Purification of Atg32-V5-6HIS.** (A) Lysate from *atg32Δ* mutant cells expressing *pATG32-V5-6HIS* was prepared as described in the Material and Methods section. Next, lysate was loaded on a Ni-NTA column, the non-retained fraction, as well as the two washes W1 and W2, were recovered. The bounded proteins were then eluted and 500  $\mu$ l fractions were collected. **(B-D)** 250  $\mu$ l of each fraction absorbing at 254 nm (from F12 to F22) were precipitated with TCA. Pellets were resuspended in 20  $\mu$ l of the loading buffer; 10  $\mu$ l were loaded on the gel to be revealed with the colloidal blue (B) and 5  $\mu$ l were used for immunodetection with anti-histidine (C) or anti-ubiquitin antibodies (D), respectively
