# Supplementary material for: The yeast mitophagy receptor Atg32 is ubiquitinated and degraded by the proteasome
Source: PubMed Central journal article supplement (PMC7757876; doi:10.1371/journal.pone.0241576), 2020-12-23
Supplement: pone.0241576.s008.pdf [file pone.0241576.s008.pdf]

# Figure S8

## Peptide SEQUEST

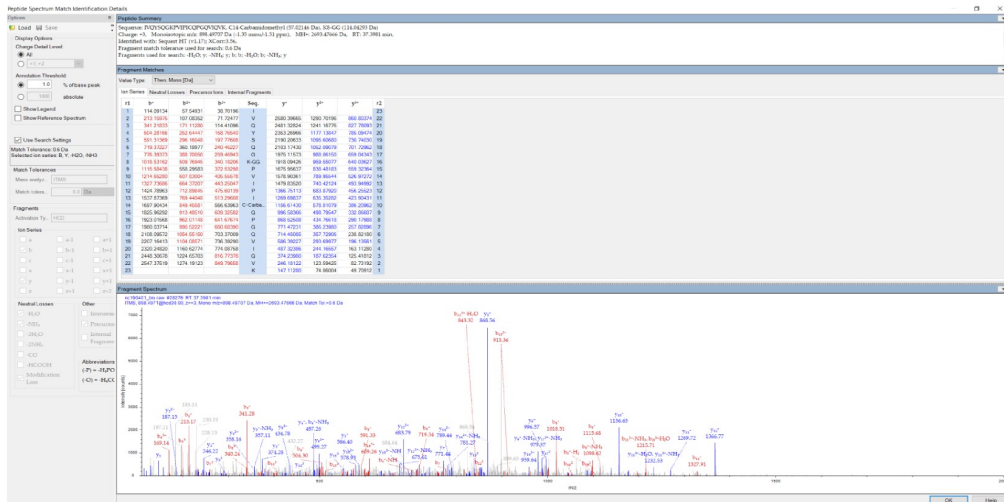

## Peptide MASCOT

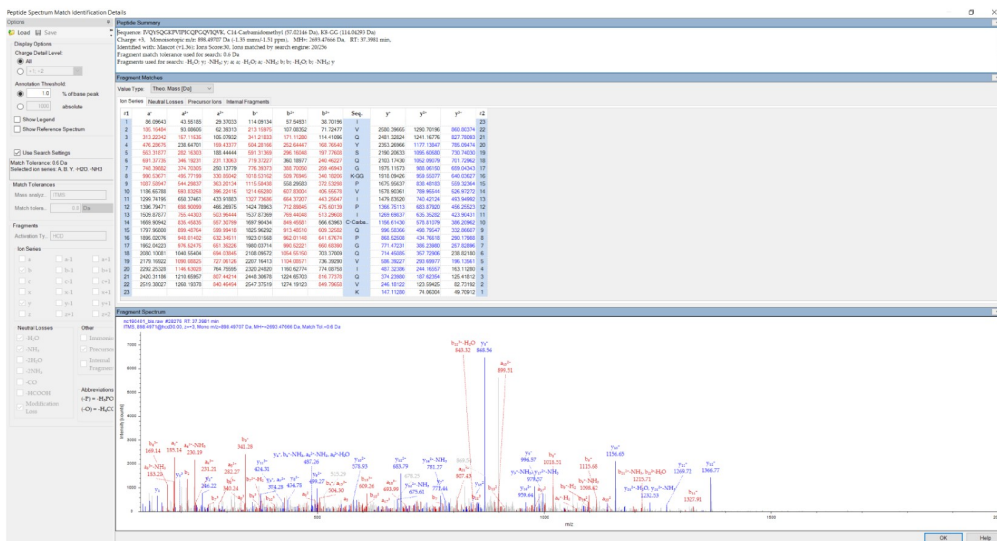

## Protein coverage

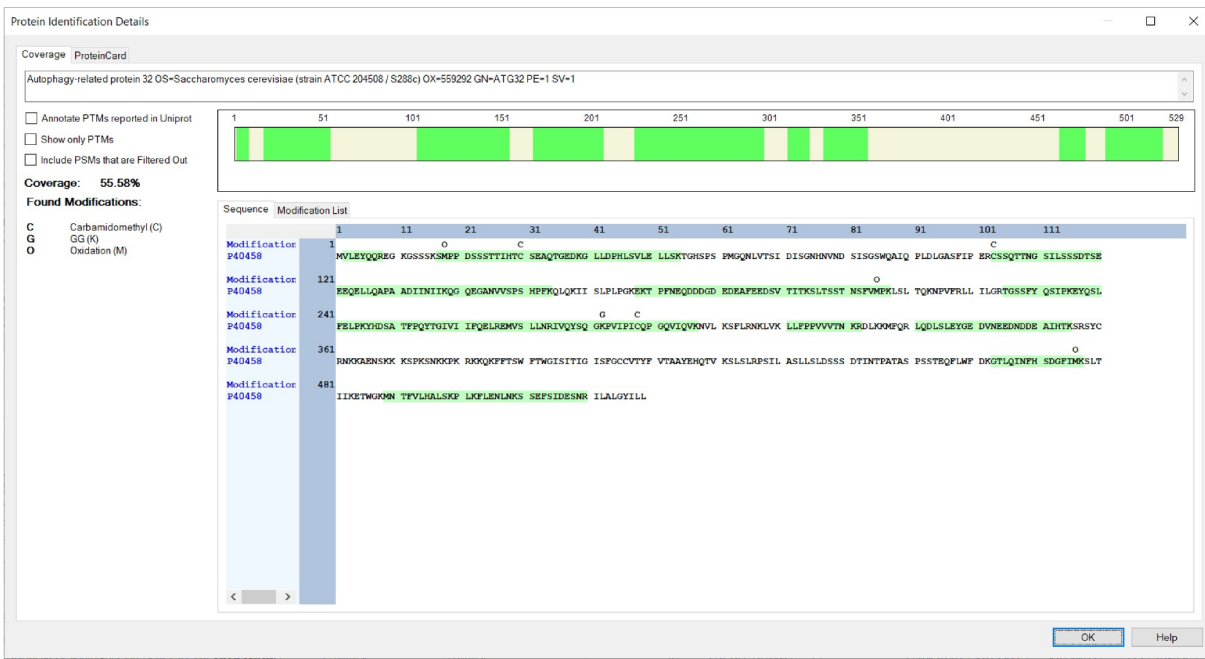

**Figure S8: Mass spectrometry analysis.** (A) SEQUEST spectra, (B) MASCOT spectra, and (C) Protein coverage.
