# Supplementary material for: The yeast mitophagy receptor Atg32 is ubiquitinated and degraded by the proteasome
Source: PubMed Central journal article supplement (PMC7757876; doi:10.1371/journal.pone.0241576), 2020-12-23
Supplement: pone.0241576.s009.pdf [file pone.0241576.s009.pdf]

## Supplementary Table I

### STRAINS

| <b>Souche</b>                                    | <b>Genotype</b>                                                                                                                                                                                |
|--------------------------------------------------|------------------------------------------------------------------------------------------------------------------------------------------------------------------------------------------------|
| BY4742 + Idp1-GFP+ Atg32-V5                      | Mat $\alpha$ ; <i>his3<math>\Delta</math>1</i> ; <i>leu2<math>\Delta</math>0</i> ; <i>lys2<math>\Delta</math>0</i> ; <i>ura3<math>\Delta</math>0</i> ; <i>pIDP1-GFP</i> , <i>pYES-Atg32-V5</i> |
| BY4742 + pPROM-ATG32- $\beta$ -galactosidase,    | Mat $\alpha$ ; <i>his3<math>\Delta</math>1</i> ; <i>leu2<math>\Delta</math>0</i> ; <i>lys2<math>\Delta</math>0</i> ; <i>ura3<math>\Delta</math>0</i> ; YEp357-promATG32-lacZ                   |
| $\Delta$ atg32 + Idp1-GFP+ Atg32-V5              | BY4742 <i>atg32::kanMX4 pIDP1-GFP</i> , <i>pYES-Atg32-V5</i>                                                                                                                                   |
| $\Delta$ atg32 + HA- Atg32-V5                    | BY4742 <i>atg32::kanMX4 pHA-Atg32</i>                                                                                                                                                          |
| $\Delta$ atg32 + Idp1-GFP                        | BY4742 <i>atg32::kanMX4 pIDP1-GFP</i>                                                                                                                                                          |
| $\Delta$ atg5 + Atg32-V5                         | BY4742 <i>atg5::kanMX4 pYES-Atg32-V5</i>                                                                                                                                                       |
| $\Delta$ atg8 + Atg32-V5                         | BY4742 <i>atg8::kanMX4, ppYES-Atg32-V5</i>                                                                                                                                                     |
| $\Delta$ atg11 + Atg32-V5                        | BY4742 <i>atg11::kanMX4, pYES-Atg32-V5</i>                                                                                                                                                     |
| $\Delta$ atg32 + Idp1-GFP                        | BY4742 <i>atg32::kanMX4, pIDP1-GFP</i>                                                                                                                                                         |
| <i>pre2-2</i> + <i>Atg32-V5</i>                  | BY4742 <i>his3<math>\Delta</math>1</i> ; <i>leu2<math>\Delta</math>0</i> ; <i>met15<math>\Delta</math>0</i> ; <i>ura3<math>\Delta</math>0</i> <i>pre2-2::KanMX4 pYES-Atg32-V5</i>              |
| $\Delta$ atg32 + Atg32-V5 K282A                  | BY4742 <i>atg32::kanMX4 pIDP1-GFP</i> , <i>pAtg32-V5 lysine 282 replaced by alanine</i>                                                                                                        |
| $\Delta$ atg32 + Atg32-V5 mutated RSP5 motif     | BY4742 <i>atg32::kanMX4 pIDP1-GFP</i> , <i>pAtg32-V5 motif L263P264K265Y266 replaced by A263A264A265A266</i>                                                                                   |
| $\Delta$ atg32 $\Delta$ pho8 + Atg32-V5 + mtPho8 | BY4742 <i>atg32::kanMX4 pho8::HIS3 pFL39-COXIV-PHO8<math>\Delta</math>60</i> ; <i>pYES-Atg32-V5</i>                                                                                            |
