# Supplementary material for: The yeast mitophagy receptor Atg32 is ubiquitinated and degraded by the proteasome
Source: PubMed Central journal article supplement (PMC7757876; doi:10.1371/journal.pone.0241576), 2020-12-23
Supplement: pone.0241576.s010.pdf [file pone.0241576.s010.pdf]

## Data for the graphs

### Figure 2B

*atg32Δ* + Atg32-V5 strain: growth

|     |       |       |      |      |       |       |      |      |
|-----|-------|-------|------|------|-------|-------|------|------|
| T0  | 1.14  | 0.927 | 1.37 | 0.91 | 0.78  | 0.69  | 1.32 | 1.15 |
| 8h  | 1.05  | 0.28  | 0.75 | 1.1  | 1.33  |       |      |      |
| 24h | 0.32  | 0.069 | 1.27 | 1.1  | 0.73  | 0.335 | 0.39 | 0.33 |
| 48h | 0.196 | 0.11  | 0.23 | 0.28 | 0.175 | 0.112 | 0.24 | 0.1  |

### Figure 2D

HA-Atg32 level during growth

|     |      |      |      |      |      |
|-----|------|------|------|------|------|
| T0  | 1.25 | 1.42 | 1.87 | 1.28 | 1.29 |
| 8h  | 0.71 | 1.37 | 1.36 | 1.09 | 0.88 |
| 24h | 0.54 | 0.8  | 1.14 | 0.78 | 0.55 |
| 48h | 0.37 | 0.58 | 0.44 | 0.25 | 0.24 |

### Figure 3B

*atg32Δ* + Atg32-V5 strain:

|                |       |       |       |      |       |       |      |      |
|----------------|-------|-------|-------|------|-------|-------|------|------|
| T0             | 1.14  | 0.927 | 1.37  | 0.91 | 0.78  | 0.69  | 1.32 | 1.15 |
| 8h             | 1.05  | 0.28  | 0.75  | 1.1  | 1.33  |       |      |      |
| 24h            | 0.32  | 0.069 | 1.27  | 1.1  | 0.73  | 0.335 | 0.39 | 0.33 |
| 48h            | 0.196 | 0.11  | 0.23  | 0.28 | 0.175 | 0.112 | 0.24 | 0.1  |
| 24h +<br>MG132 | 0.938 | 1.55  | 1.62  | 0.94 | 0.94  |       |      |      |
| 48h +<br>MG132 | 1.22  | 1.28  | 1.6   | 1.01 | 1.2   |       |      |      |
| 24h +<br>PMSF  | 0.31  | 0.43  | 0.297 |      |       |       |      |      |
| 48h +<br>PMSF  | 0.09  | 0.33  | 0.418 |      |       |       |      |      |

**Figure 3C****BY4742+ Atg32-V5 and *pep4Δ* + Atg32-V5 strains**

|     | <b>BY4742 + Atg32-V5</b> |      |      |      | <b><i>pep4Δ</i> + Atg32-V5</b> |      |      |      |
|-----|--------------------------|------|------|------|--------------------------------|------|------|------|
| T0  | 0.66                     | 1.19 | 0.84 | 0.73 | 1.07                           | 2.11 | 0.91 | 0.99 |
| 48h | 0.38                     | 0.1  | 0.1  | 0.37 | 0.31                           | 0.57 | 0.4  | 0.36 |

**Figure 4A****ATG32 Promoter activity**

|                |      |      |      |      |      |      |      |      |
|----------------|------|------|------|------|------|------|------|------|
| T0             | 100% |      |      |      |      |      |      |      |
| 24h            | 200% | 150% | 200% | 110% | 80%  | 145% |      |      |
| 48h            | 380% | 580% | 440% | 298% | 610% | 330% | 346% | 235% |
| 48h +<br>MG132 | 103% | 80%  | 300% | 410% | 75%  | 60%  | 40%  |      |

**Figure 4C****Cycloheximide treatment**

|                 |       |      |      |      |     |
|-----------------|-------|------|------|------|-----|
| T0              | 0,98  | 0,9  | 1,01 | 1,6  | 1,4 |
| 20 min          | 0,66  | 0,74 | 0,36 |      |     |
| 20 min + MG-132 | 1,34  | 0,64 | 0,8  | 0,76 |     |
| 40 min          | 0,507 | 0,26 | 0,32 |      |     |
| 40 min + MG-132 | 0,58  | 0,68 | 0,7  | 0,83 |     |
| 1h              | 0,26  | 0,24 | 0,37 | 0,05 |     |
| 1h + MG-132     | 1,1   | 0,99 | 0,92 | 0,98 |     |

**Figure 5B*****atg32Δ* + Atg32-V5 and *pre2-2* strains**

|     | <b><i>atg32Δ</i> + Atg32-V5</b> |      |      |      | <b><i>pre2-2</i> + Atg32-V5</b> |      |      |      |
|-----|---------------------------------|------|------|------|---------------------------------|------|------|------|
| T0  | 0.99                            | 1.98 | 0.61 | 2    | 0.72                            | 1.8  | 1.39 | 2.1  |
| 48h | 0.31                            | 0.3  | 0.17 | 0.14 | 1.22                            | 0.94 | 1.04 | 1.47 |

**Figure 6C**

|                 | <b><i>atg32Δ</i> + Atg32-V5</b> |       |       |       | <b>BY4742 + Atg32-V5</b> |       |       |  |
|-----------------|---------------------------------|-------|-------|-------|--------------------------|-------|-------|--|
| 24h             | 0,251                           | 0,176 | 0,43  | 0,05  | 0,124                    | 0,033 | 0,397 |  |
| 24h +<br>MG-132 | 0,5                             | 0,255 | 0,256 | 0,418 | 0,223                    | 0,391 |       |  |
| 48h             | 0,435                           | 0,426 | 0,062 | 0,216 | 0,179                    | 0,127 | 0,452 |  |
| 48h +<br>MG6132 | 0,292                           | 0,718 | 0,296 | 0,421 | 0,244                    | 0,465 |       |  |

**Figure 6D****BY4742: Mt PHO8 activity**

|                |       |       |       |       |       |       |
|----------------|-------|-------|-------|-------|-------|-------|
| T0             | 0.458 | 0.445 | 0.376 | 0.368 | 0.376 | 0.364 |
| 48h            | 0.99  | 1.08  | 0.75  | 0.73  |       |       |
| 48h +<br>MG132 | 1.89  | 2.14  | 1.68  | 1.72  |       |       |

## Figure 8C

### Atg32-V5 levels in *atg32* mutants

|                                      |     |      |      |      |      |       |      |
|--------------------------------------|-----|------|------|------|------|-------|------|
| Atg32 +<br><i>atg32</i> -V5          | T0  | 2.22 | 1.24 | 0.99 | 1.98 | 1,14  | 0,37 |
|                                      | 48h | 0    | 0.02 | 0.17 | 0.14 | 0,175 | 0,11 |
| Atg32 +<br><i>atg32</i> -V5<br>K282A | T0  | 1,25 | 1,71 | 1,58 | 1,71 | 1,39  | 1,02 |
|                                      | 48h | 0,27 | 0,48 | 0,21 | 0,28 | 0,38  | 0,39 |
| Atg32 +<br><i>atg32</i> -V5<br>AAAA  | T0  | 1.03 | 1.13 | 0.95 | 1.13 |       | 2.08 |
|                                      | 48h | 0.18 | 0.19 | 0.25 | 0.21 |       | 0.16 |

## Figure 9B

### Mitophagy in *atg32* mutants

|                                      |       |       |       |      |       |
|--------------------------------------|-------|-------|-------|------|-------|
| Atg32 +<br><i>atg32</i> -V5          | 0.159 | 0.137 | 0.117 | 0.3  | 0.157 |
| Atg32 +<br><i>atg32</i> -V5<br>K282A | 0.144 | 0.124 | 0.184 | 0.23 |       |
| Atg32 +<br><i>atg32</i> -V5<br>AAAA  | 0.186 | 0.203 | 0.173 | 0.27 |       |

**Figure S2B*****atg32Δ* + Atg32-V5 strain: starvation**

|                  |      |       |       |      |       |       |
|------------------|------|-------|-------|------|-------|-------|
| T0               | 100% |       |       |      |       |       |
| -N3h             | 53%  | 70%   | 53%   | 98%  | 70.7% | 95%   |
| -N6h             | 68%  | 94%   | 56%   | 45%  | 80%   | 44%   |
| -N24h            | 35%  | 12.8% | 32%   | 53%  | 21.4% | 57.6% |
| -N3h +<br>MG132  | 141% | 68%   | 129%  |      |       |       |
| -N6h +<br>MG132  | 132% | 64.3% | 109%  | 117% |       |       |
| -N24h +<br>MG132 | 62%  | 10.8% | 67.6% |      |       |       |

**Figure S3B****Atg32-V5 levels in autophagy mutants**

|               |     |      |      |      |      |
|---------------|-----|------|------|------|------|
| BY4742        | T0  | 1.08 | 1.18 | 1.73 |      |
|               | 48h | 0.25 | 0.27 | 0.28 |      |
| <i>atg5Δ</i>  | T0  | 1.13 | 0.96 | 1.4  | 0.87 |
|               | 48h | 0.21 | 0.34 | 0.22 | 0.28 |
| <i>atg8Δ</i>  | T0  | 1.1  | 1.97 | 0.85 |      |
|               | 48H | 0.28 | 0.29 | 0.11 |      |
| <i>atg11Δ</i> | T0  | 1.13 | 0.73 | 1.55 |      |
|               | 48H | 0.35 | 0.04 | 0.29 |      |

## Figure S4C

### Atg32-V5 levels in BY4742

|             |      |      |      |
|-------------|------|------|------|
| T0          | 1.08 | 1.18 | 1.73 |
| 8h          | 1.73 | 1.38 | 0.68 |
| 24h         | 1.42 | 0.83 | 0.53 |
| 48h         | 0.25 | 0.27 | 0.28 |
| 24h + MG132 | 0.89 | 1.55 | 0.96 |
| 48h + MG132 | 1.3  | 1.74 | 0.95 |
