# Supplementary material for: The yeast mitophagy receptor Atg32 is ubiquitinated and degraded by the proteasome
Source: PubMed Central journal article supplement (PMC7757876; doi:10.1371/journal.pone.0241576), 2020-12-23
Supplement: pone.0241576.s011.pdf [file pone.0241576.s011.pdf]

Figure 1A

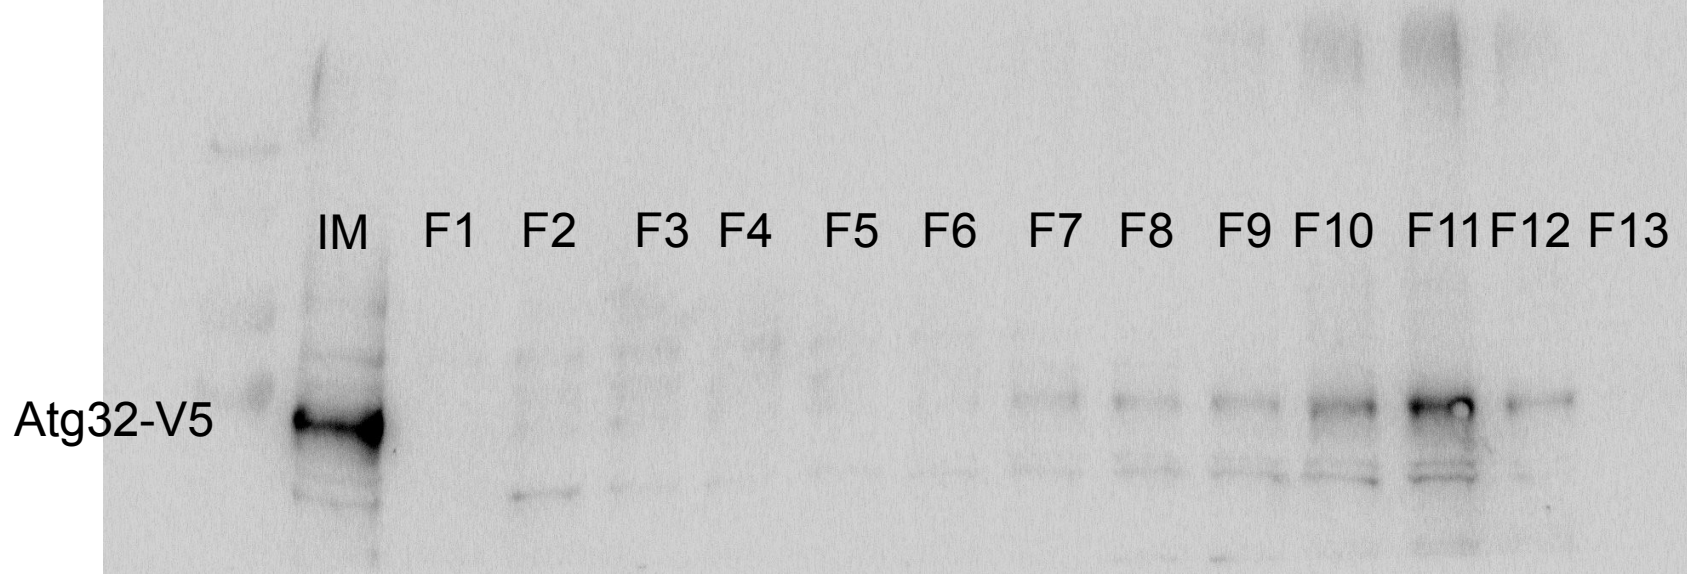

Figure 1A

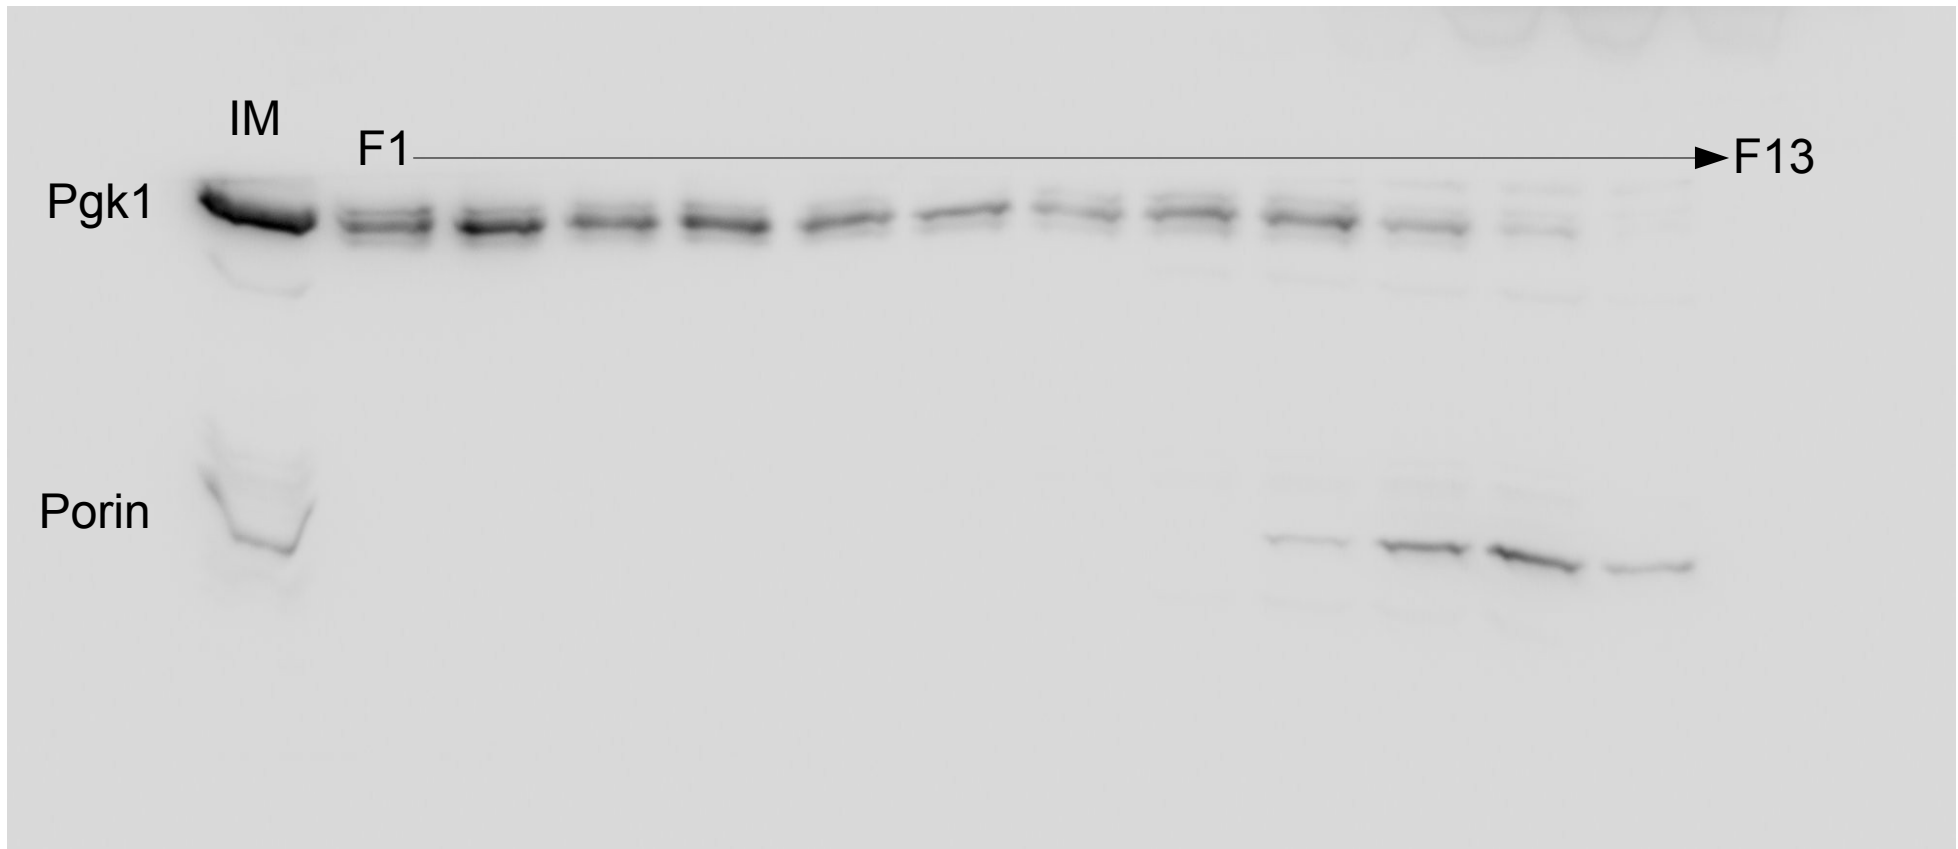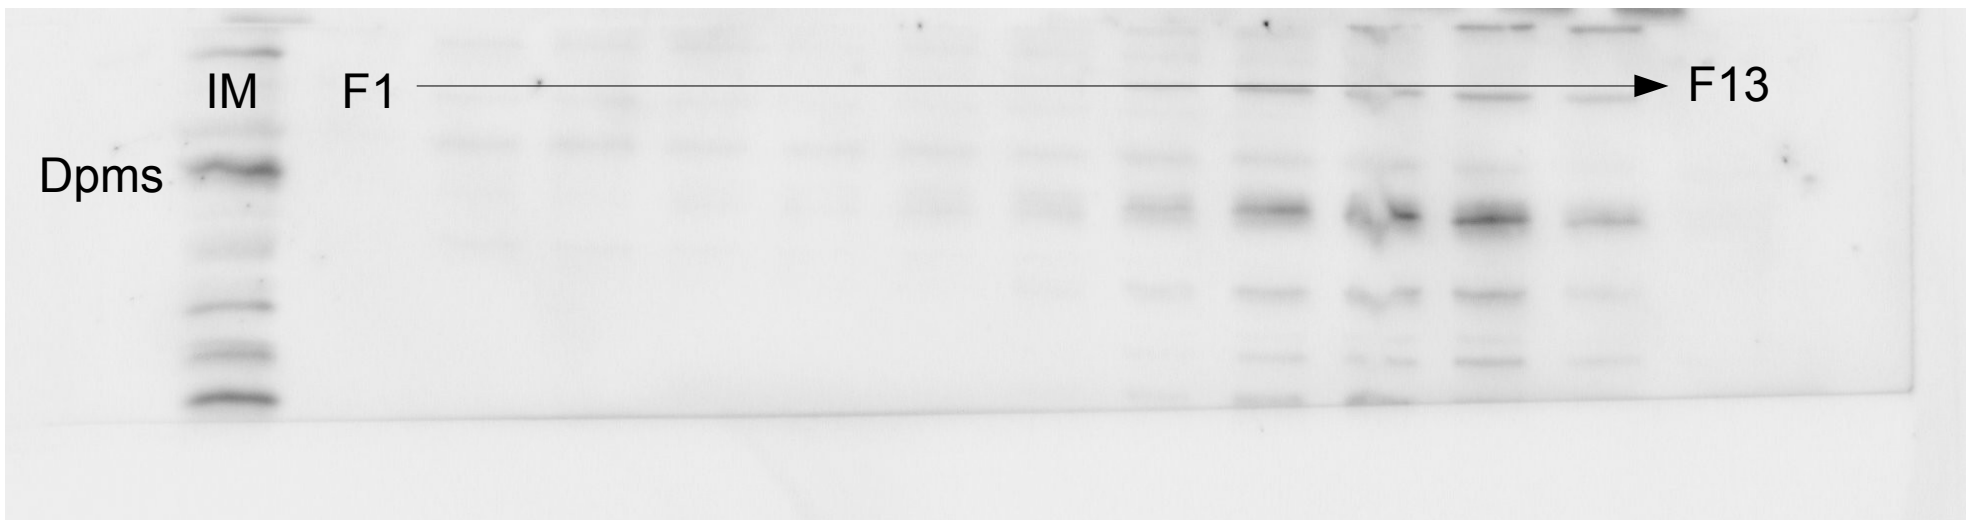

Figure 1B : GFP blotting

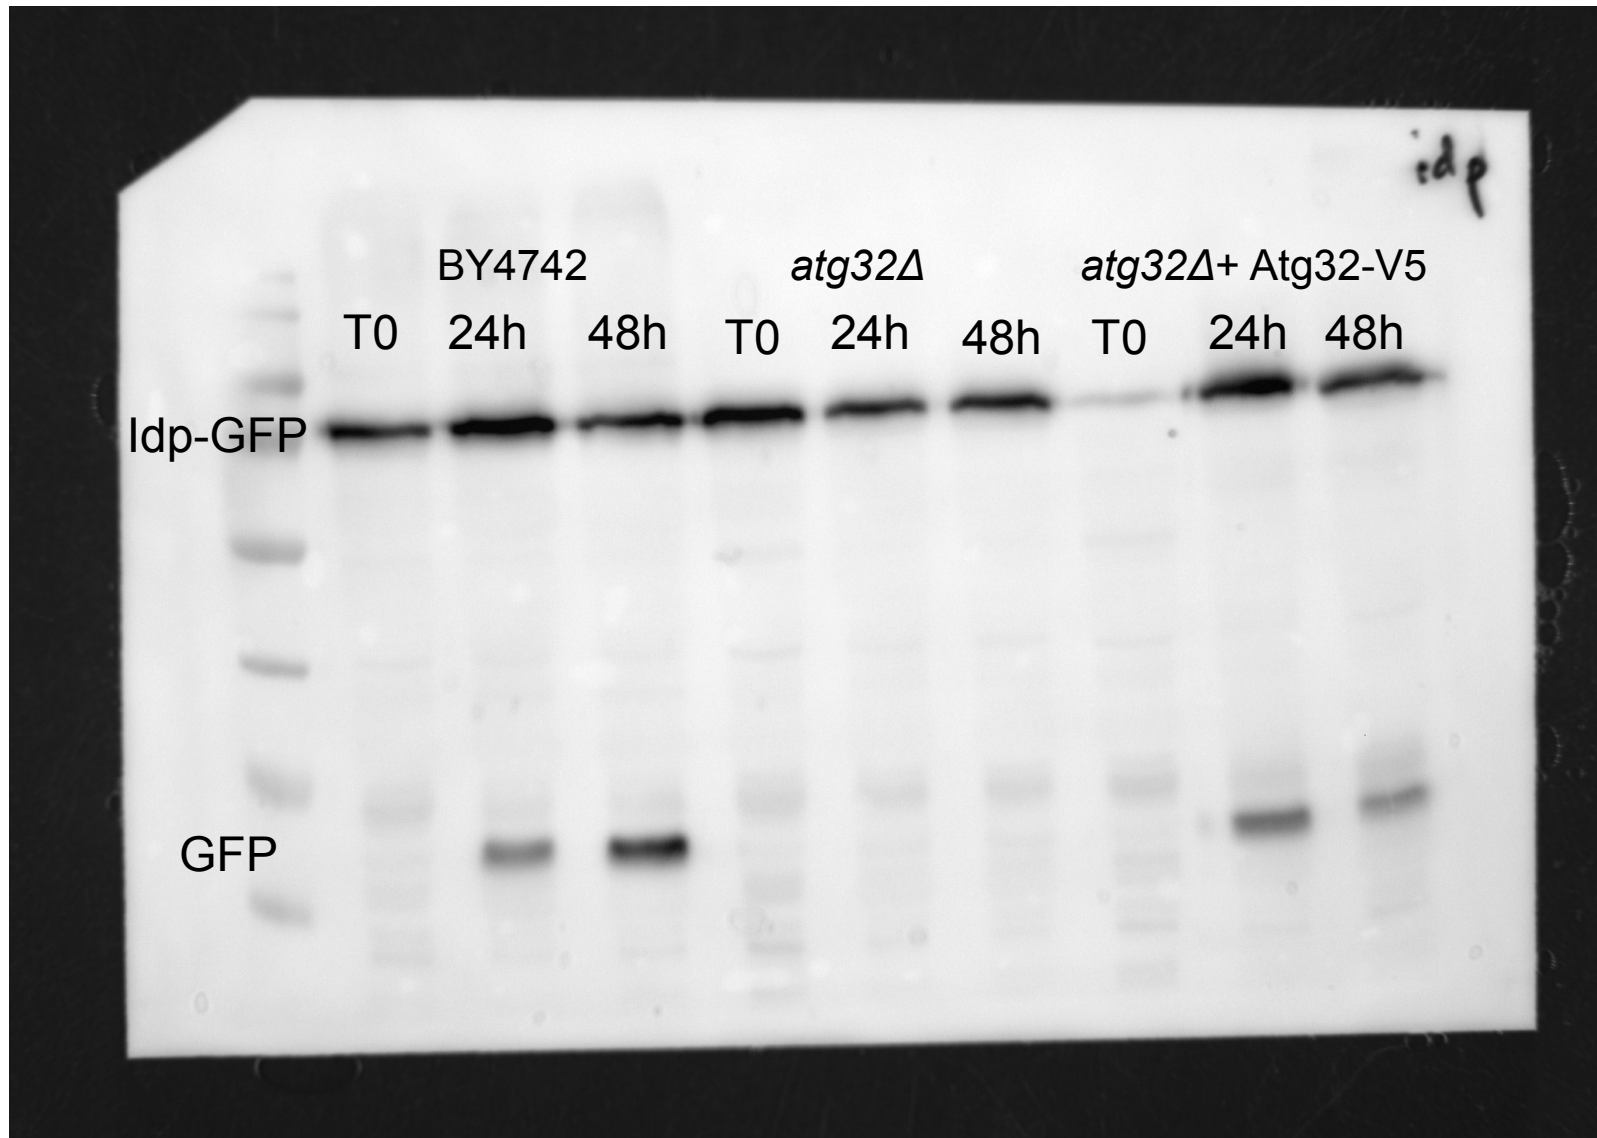

Figure 1B : Pgk1 blotting

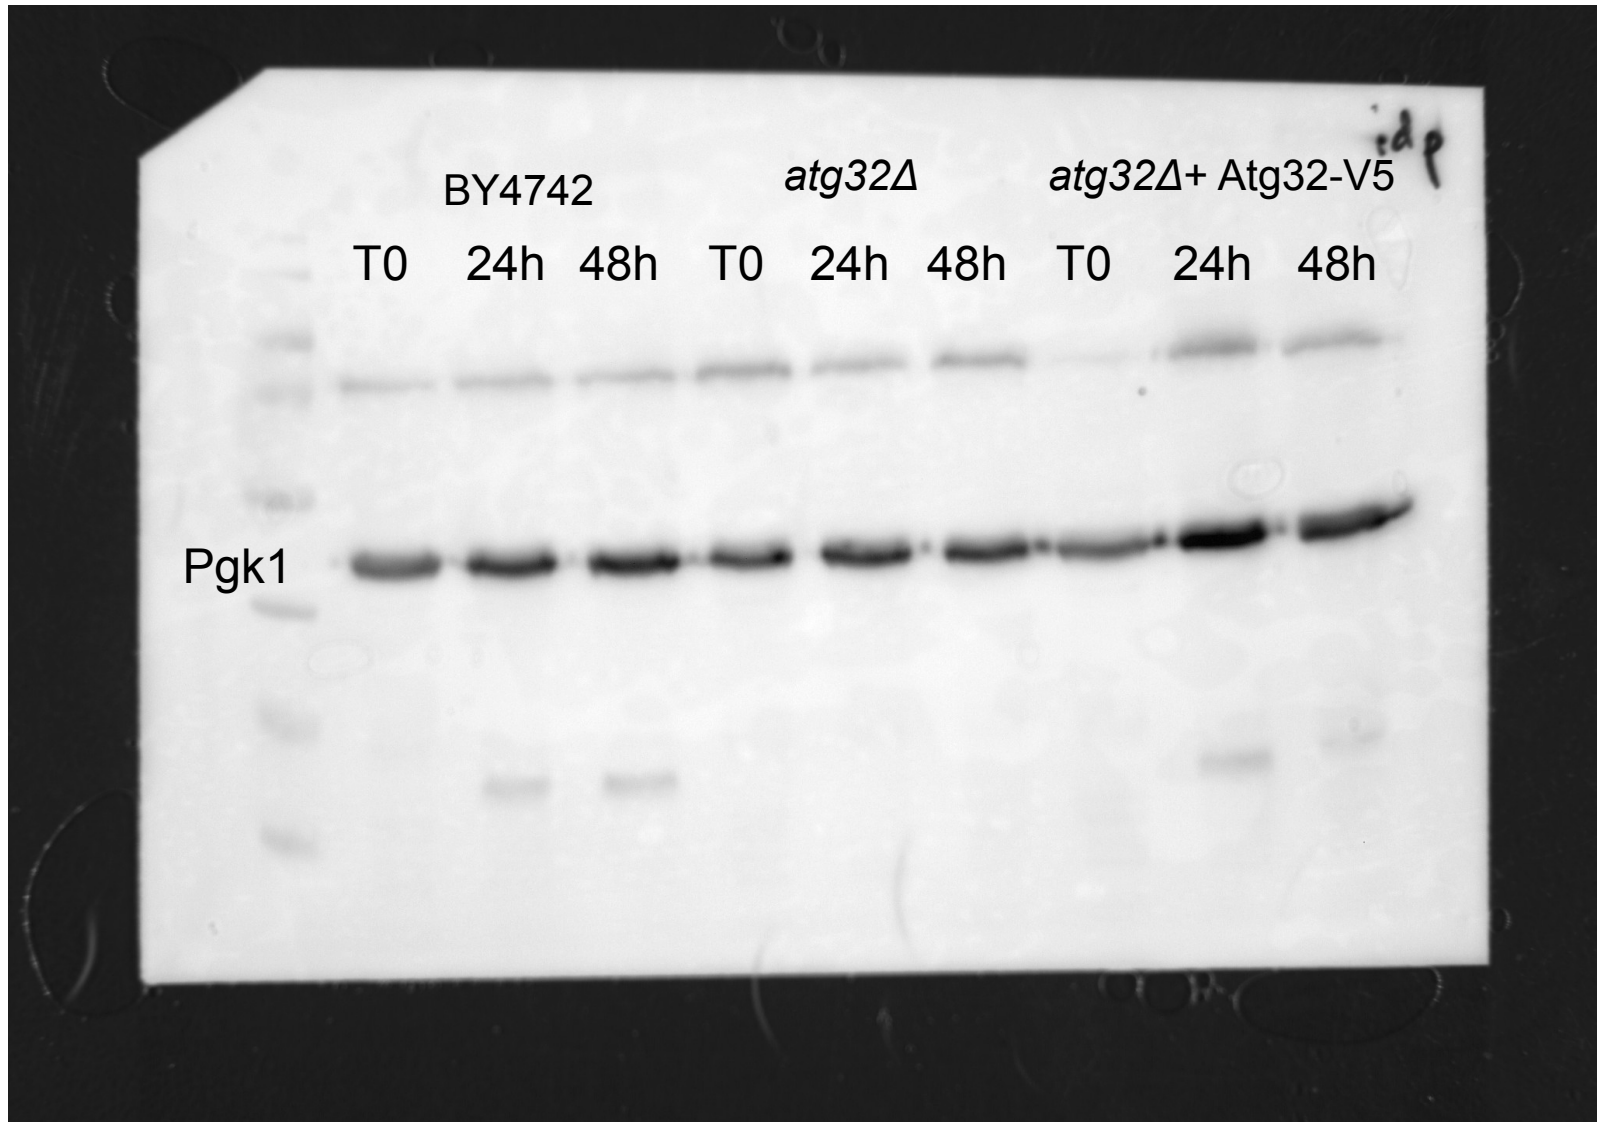

Figure 2A : V5 blotting

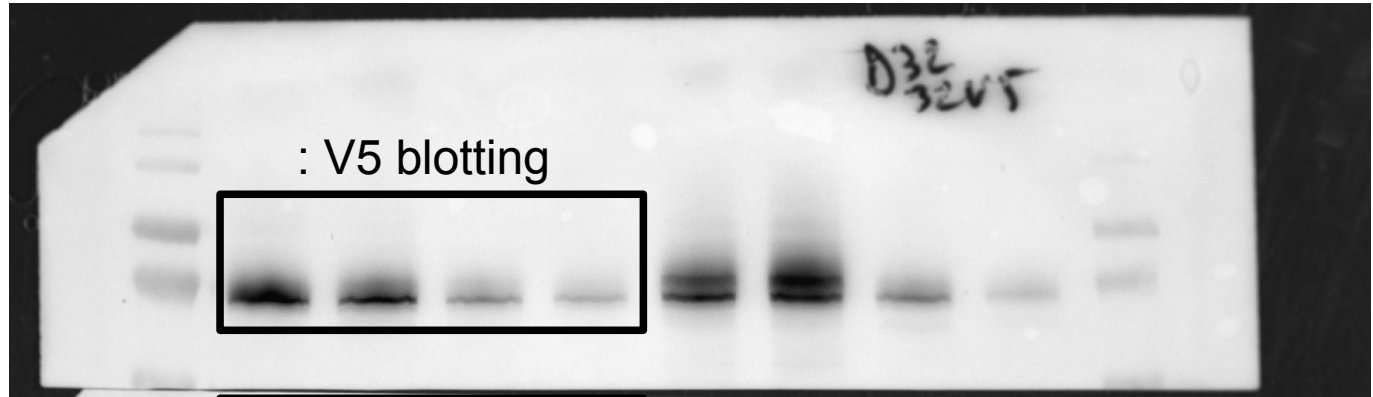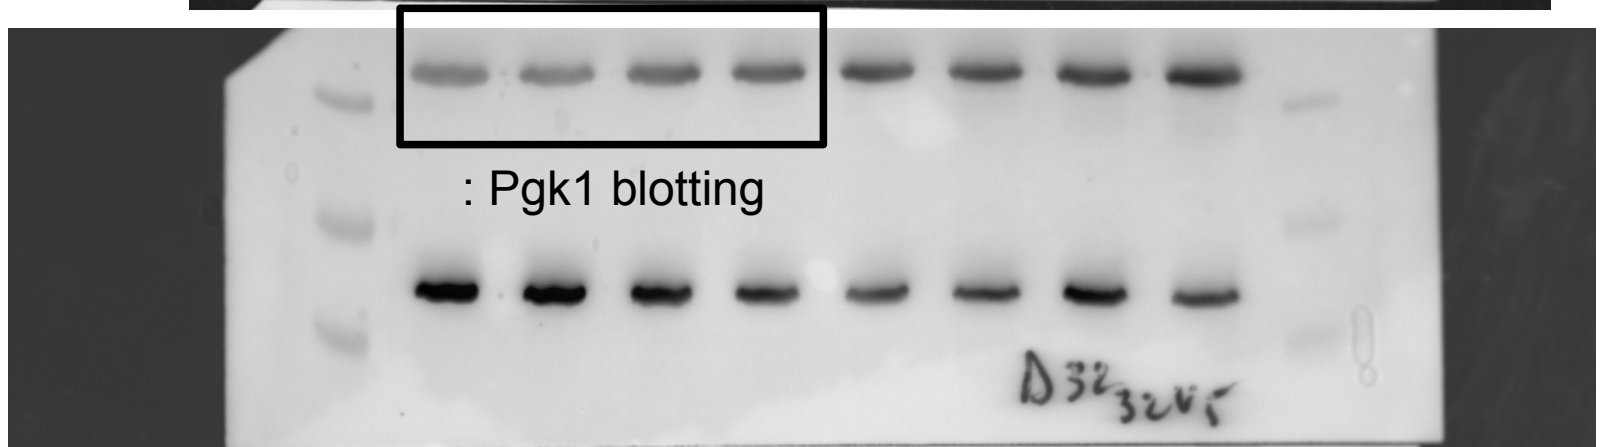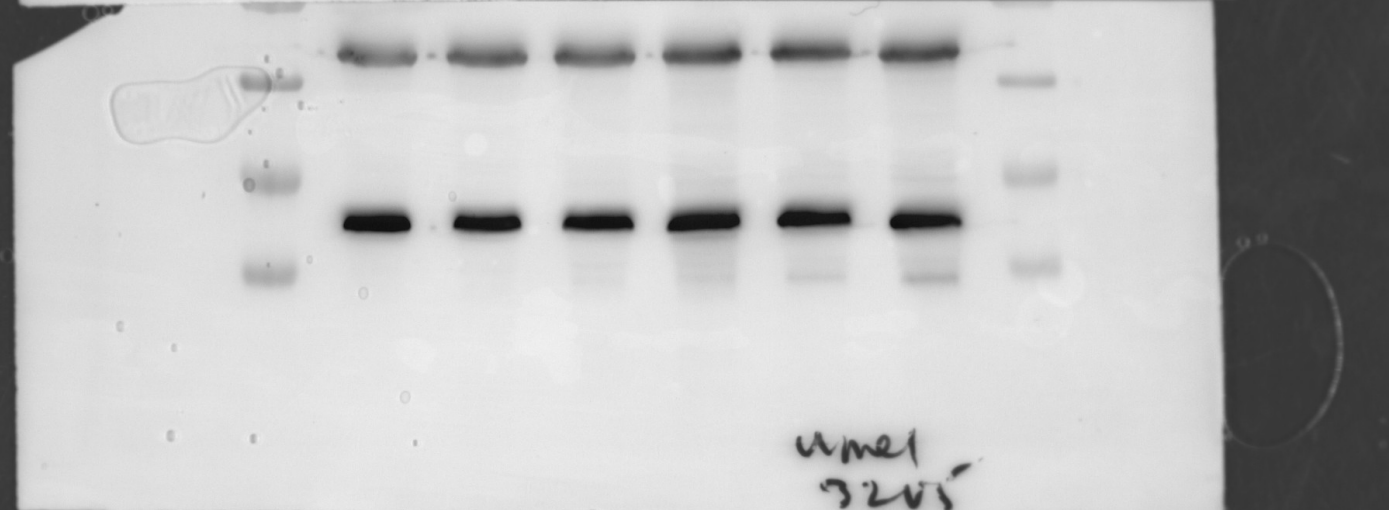

Figure 2C : HA blotting

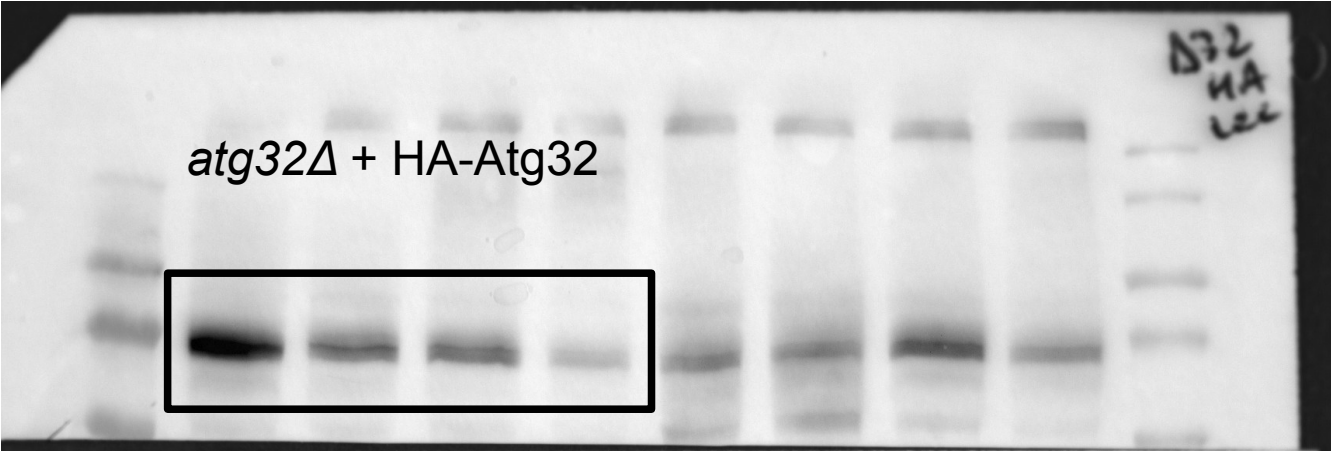

Figure 2C : Pgk1 blotting

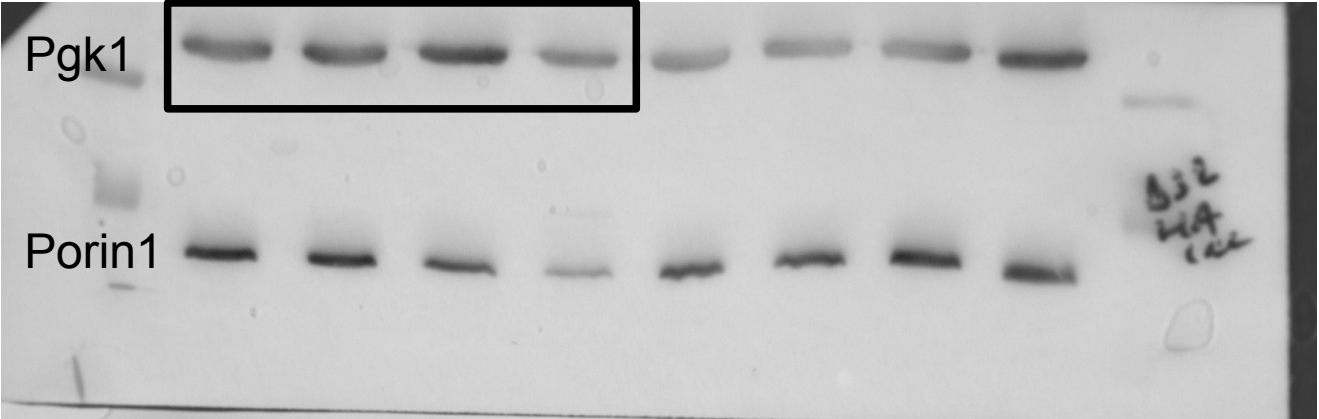



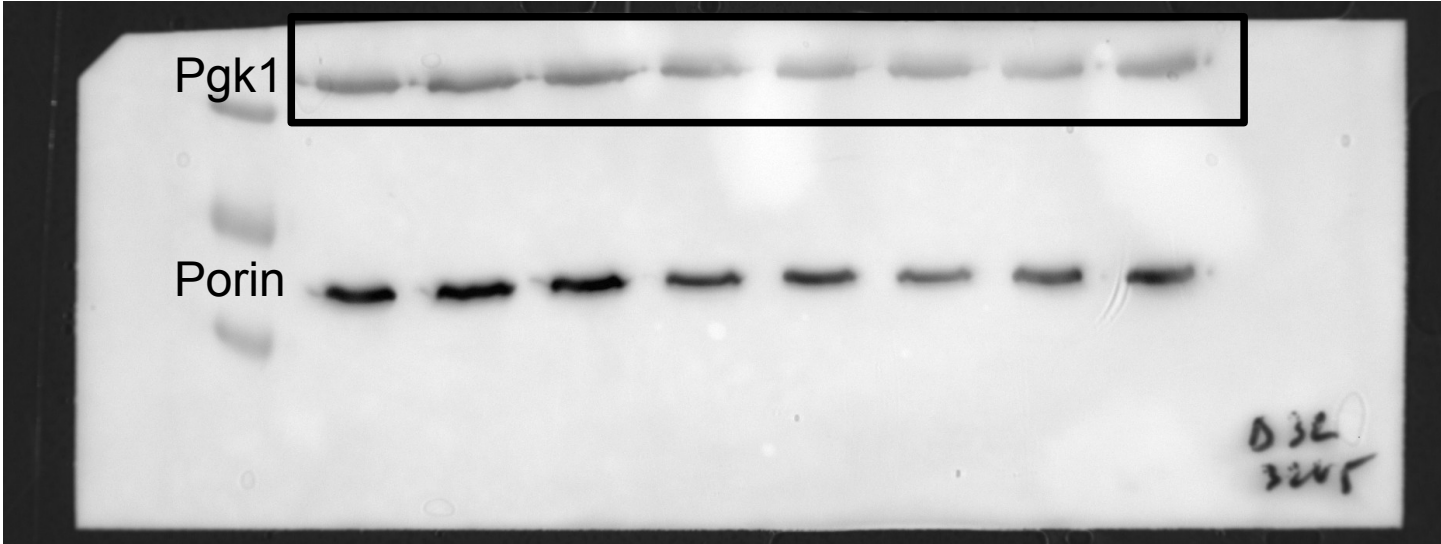

Figure 3A : Pgk1 blotting



BY4742

*pep4* $\Delta$

Figure 3C : V5 blotting

V5

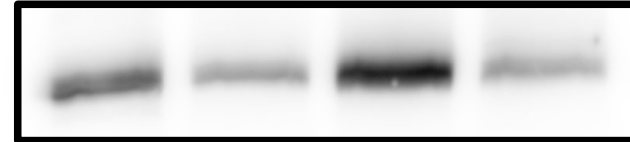

Figure 3C : Pgk1 blotting

Pgk1

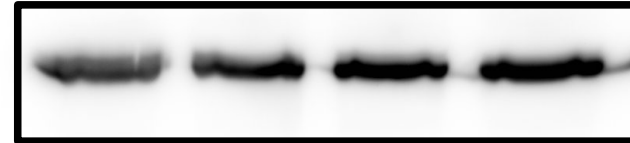

Porin

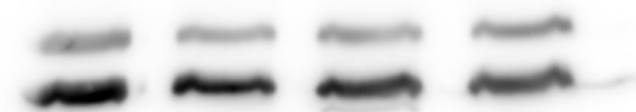

Figure 4B

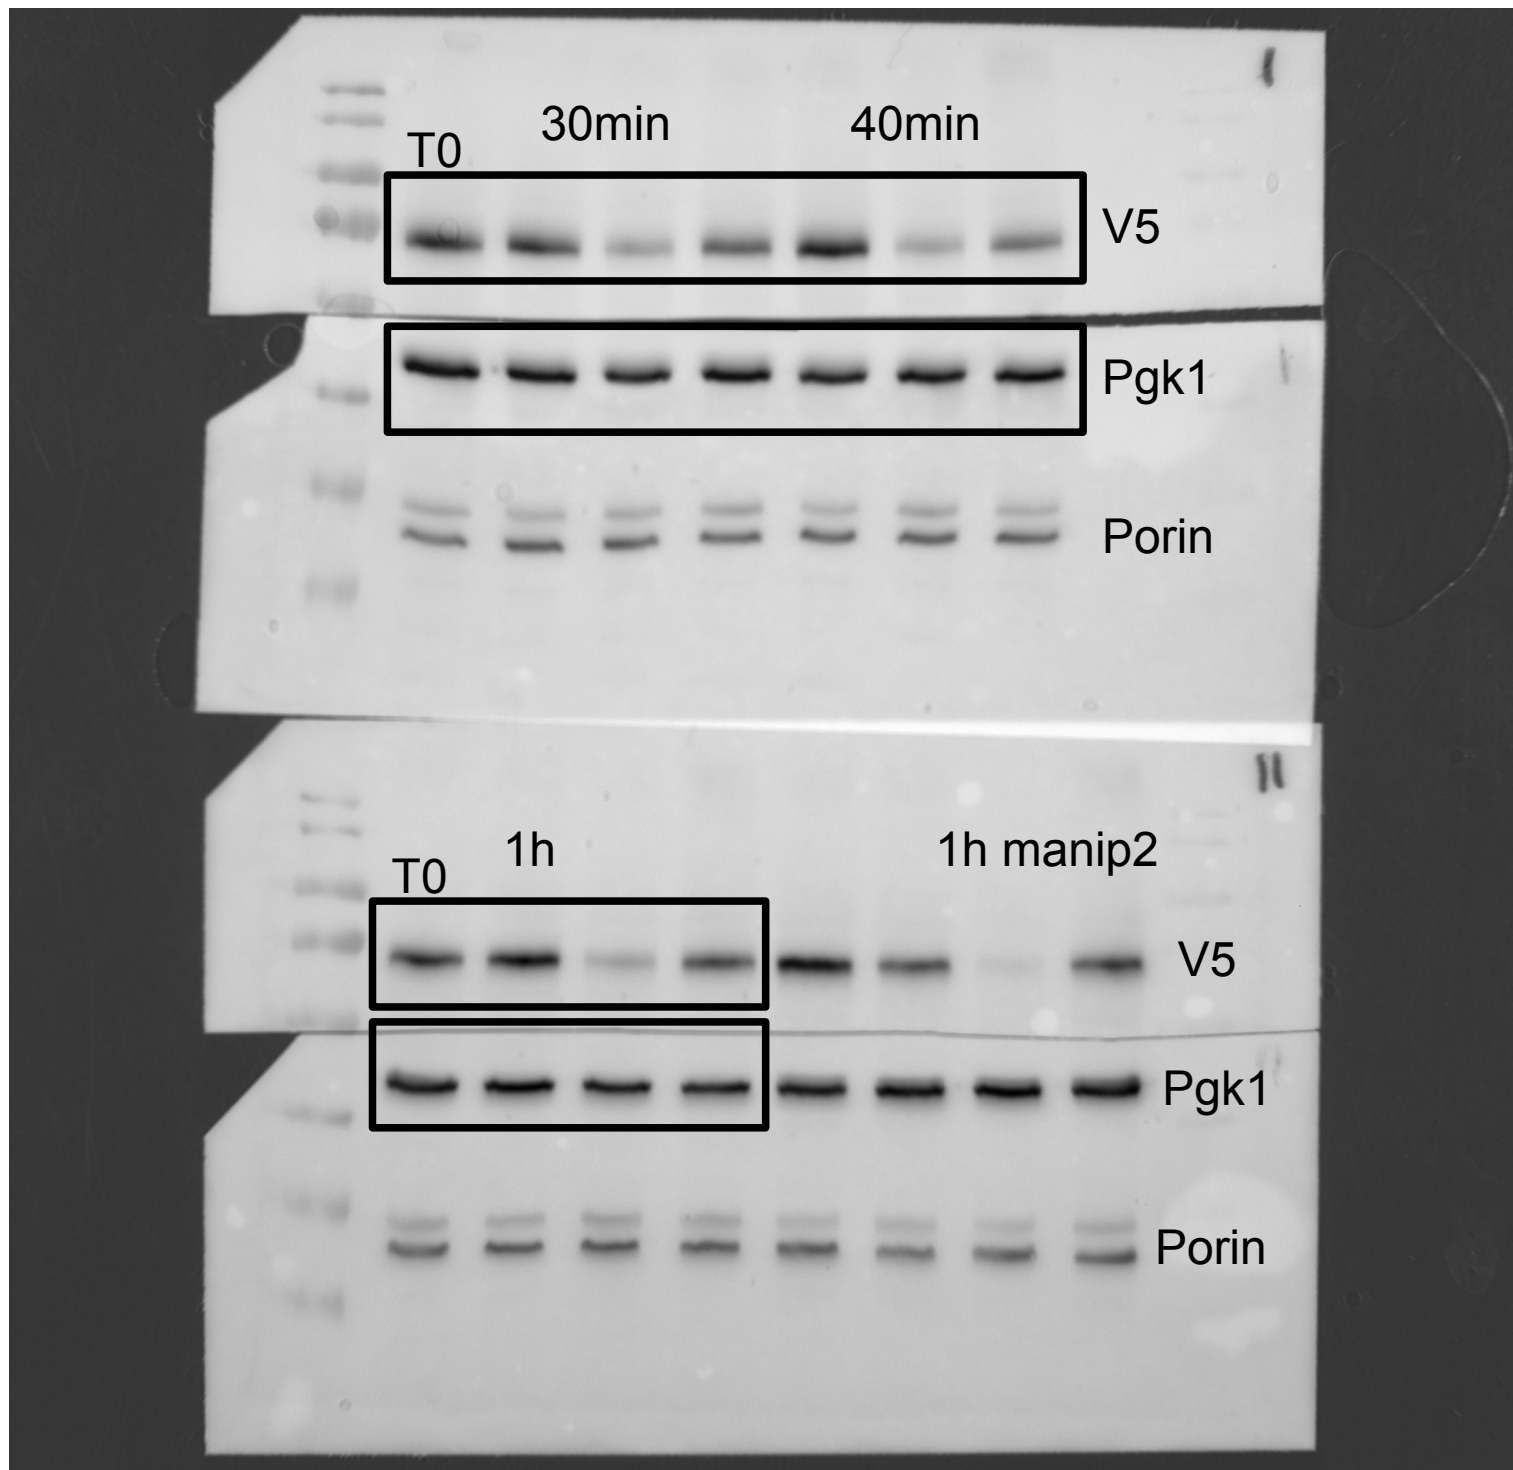

Figure 5A : V5 blotting

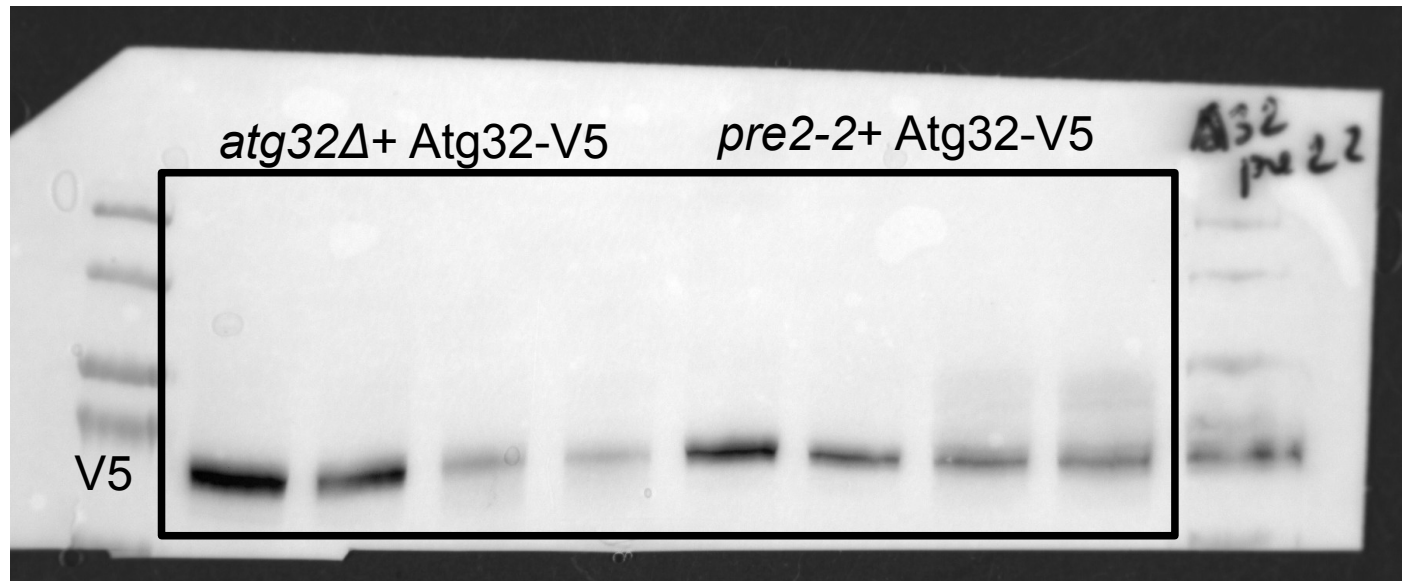

Figure 5A : Pgk1 blotting

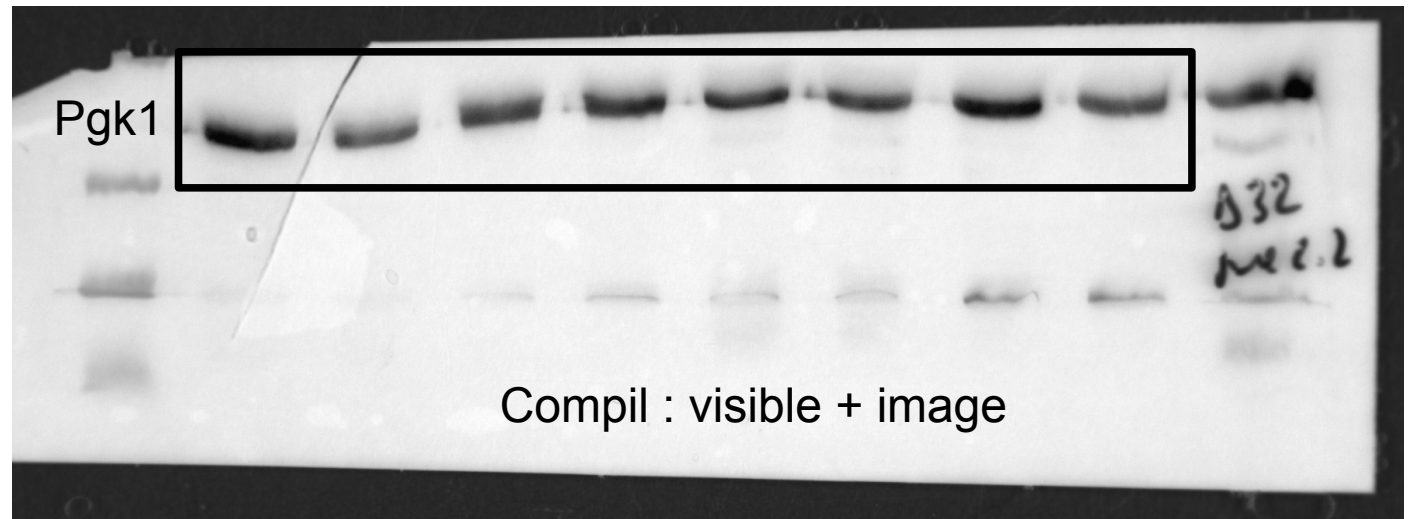

Compil : visible + image

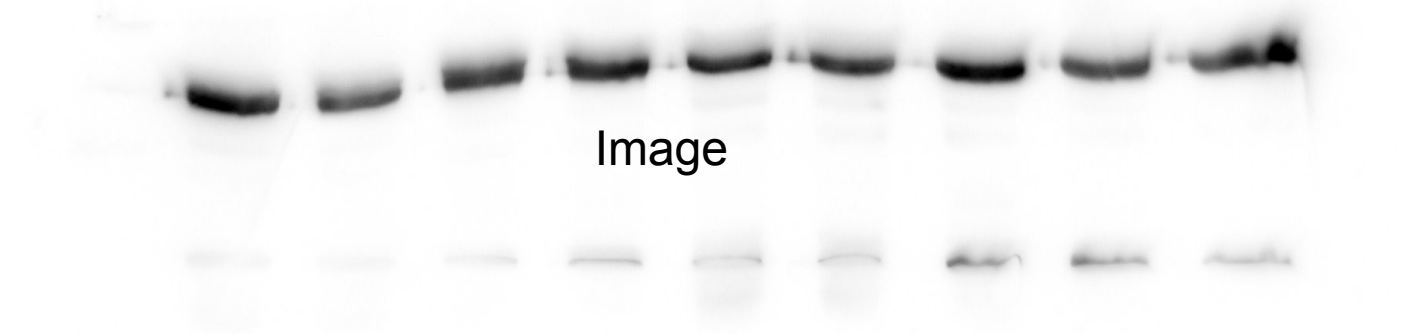

Figure 6A :  
Blotting GFP

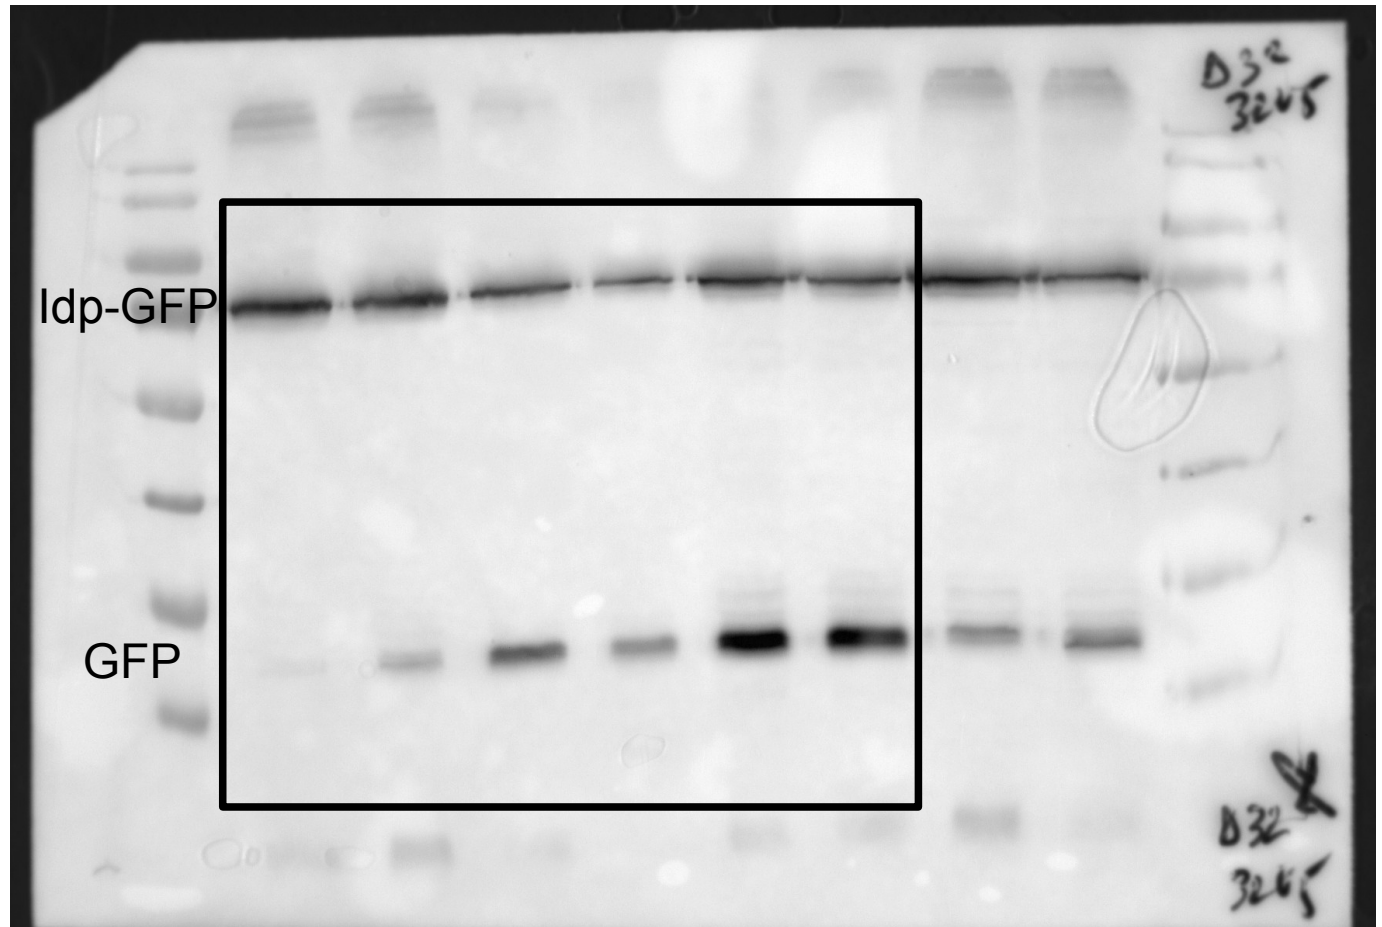

Figure 6A :  
Blotting Pgk1

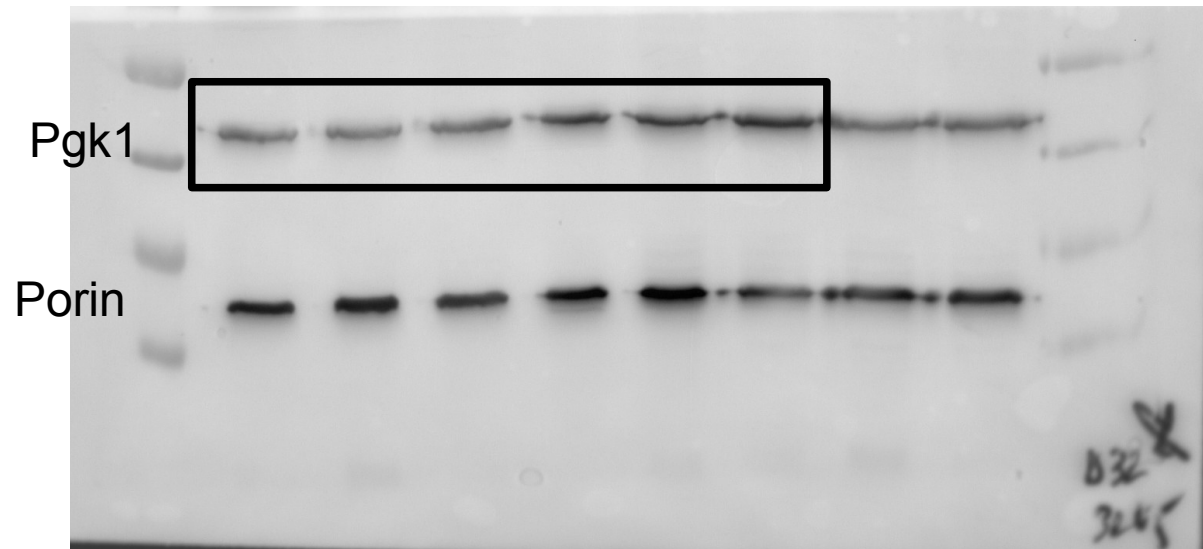



Figure 7B

Figure 7A

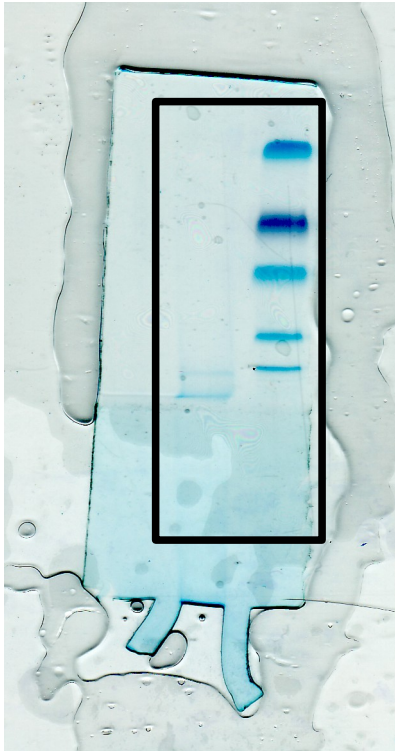

histidine blotting

ubiquitin blotting

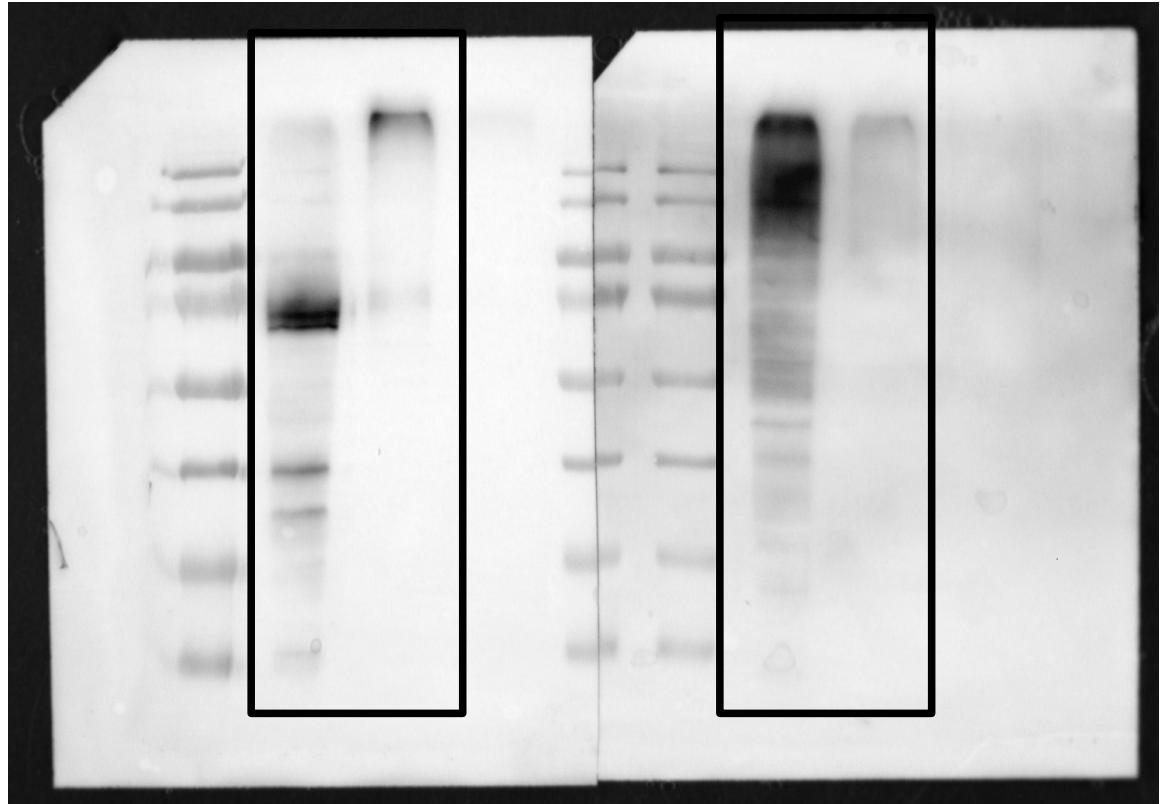

*atg32*Δ + Atg32-V5

Figure 8A : Blotting V5

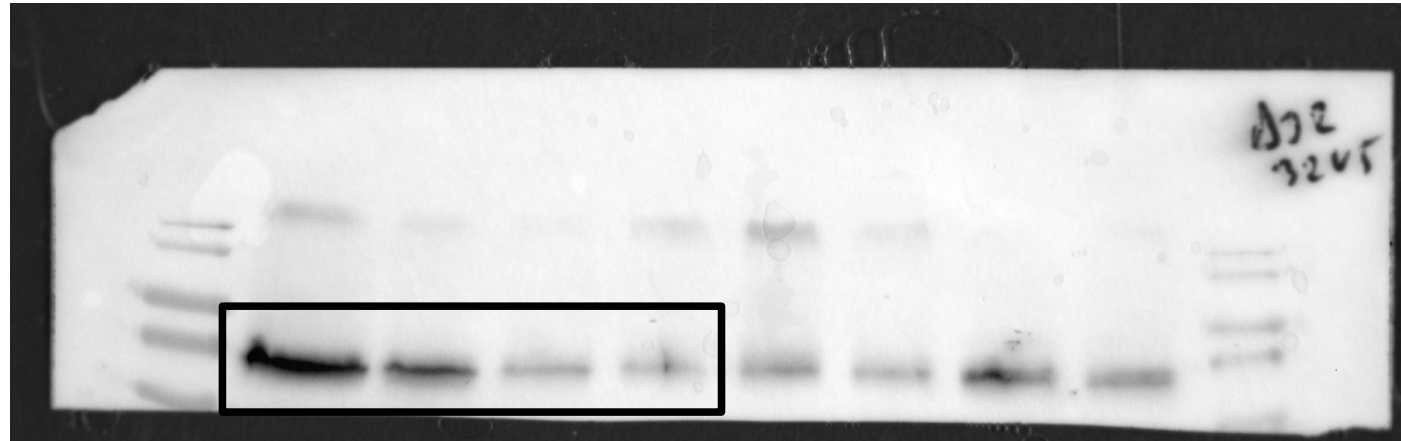

Figure 8A : Blotting Pgk1

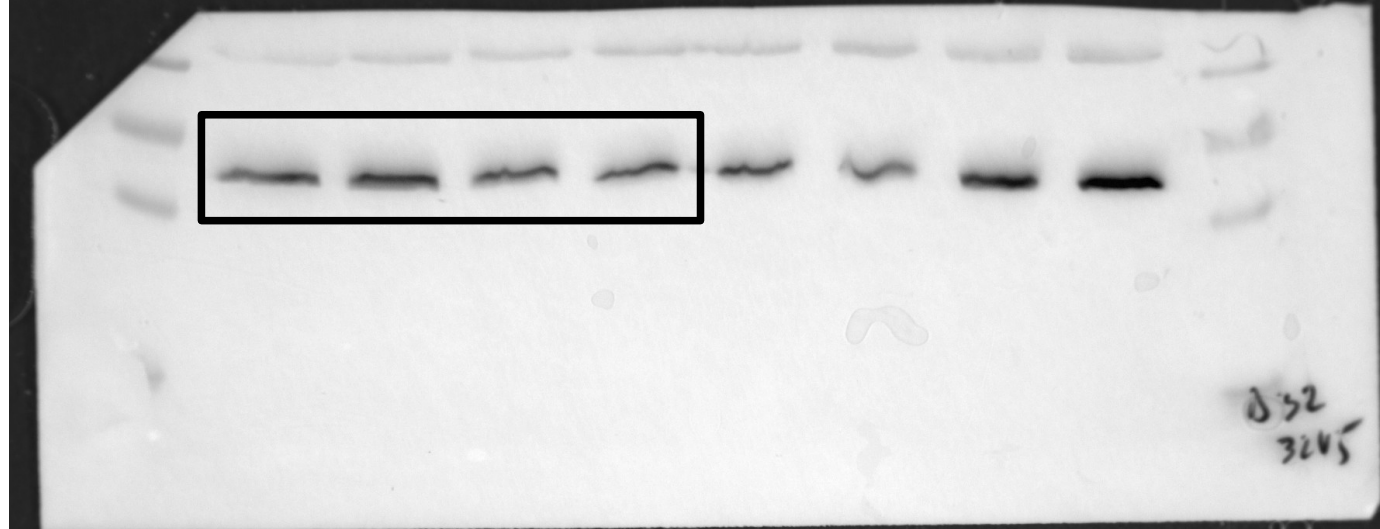

Lysine mutant

V5

clone1

32  
k<sub>d</sub>

Figure 8A : Blotting V5

V5

clone2

clone3

K<sub>2</sub>H<sub>3</sub>

Figure 8A : Blotting Pgk1

Pgk1

clone1

32  
k<sub>d</sub>

Pgk1

clone2

K<sub>2</sub>H<sub>3</sub>

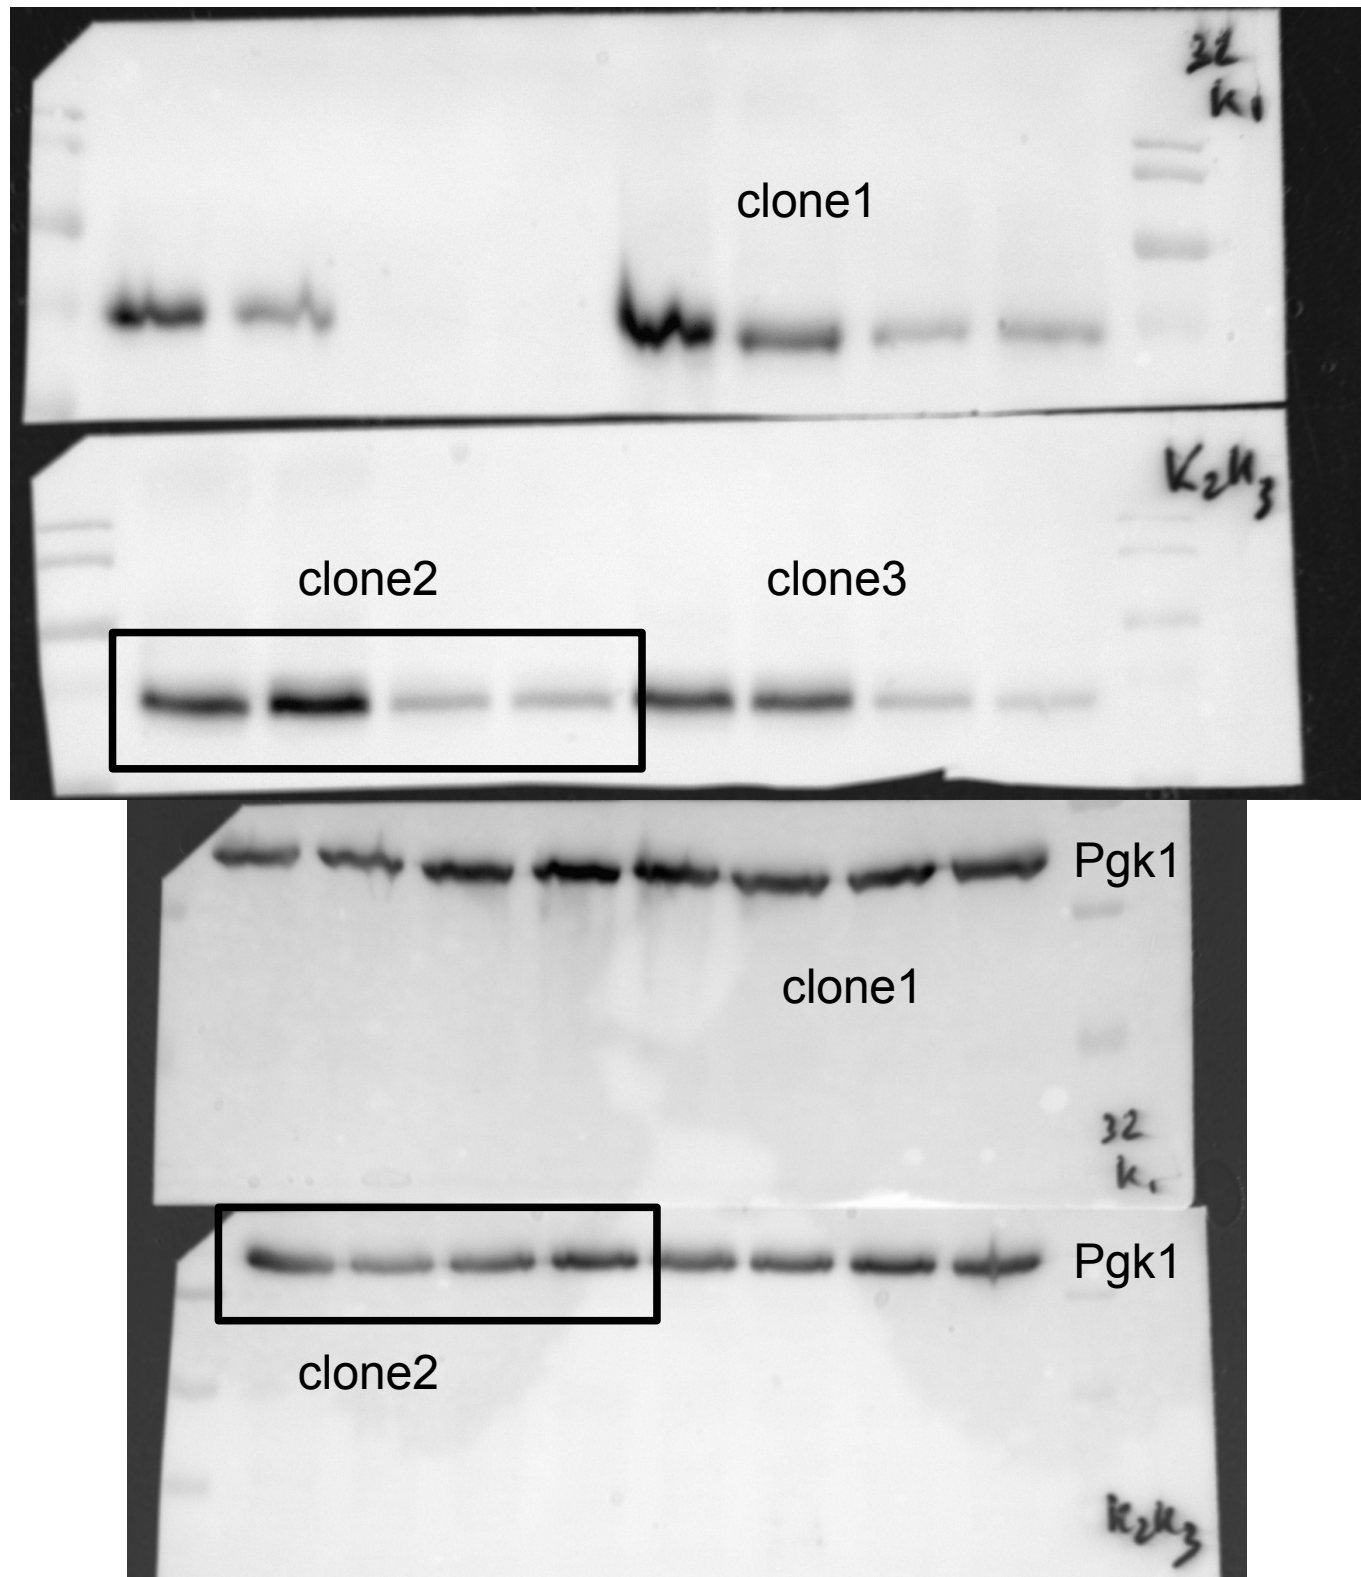



*atg32Δ* + Atg32-V5

Figure 8B : Blotting V5

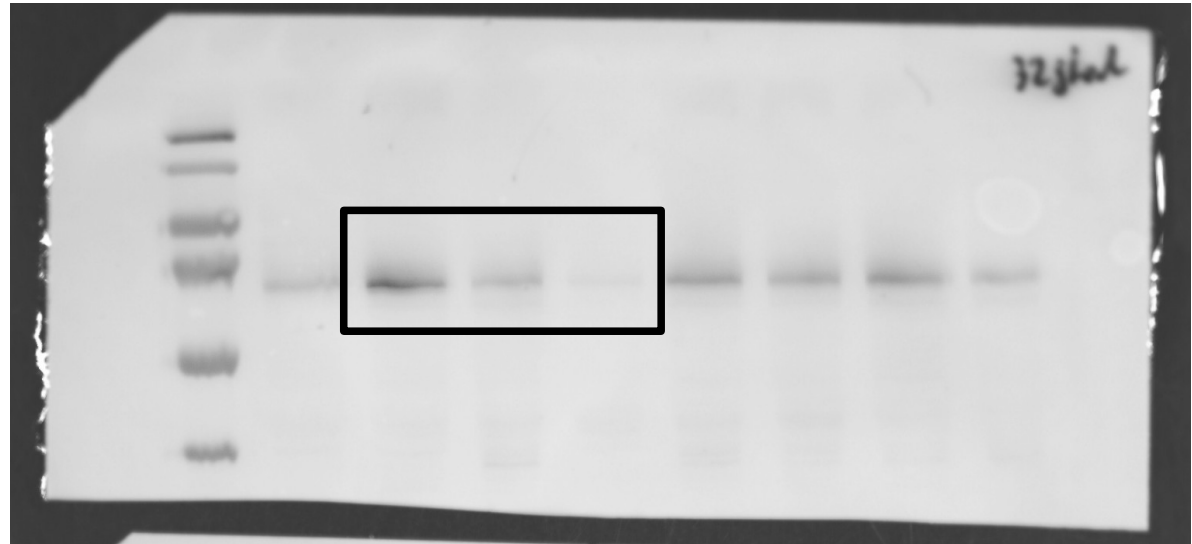

Figure 8B : Blotting Pgk1

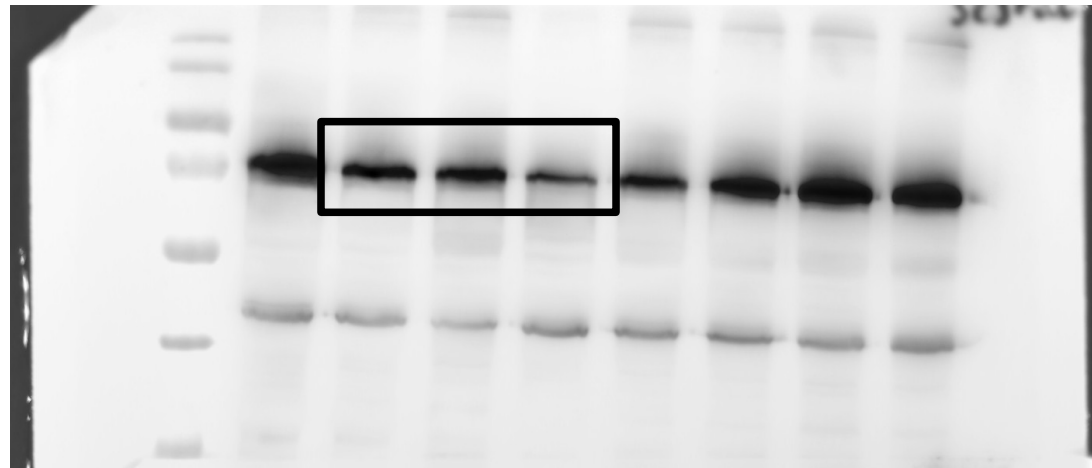

Atg32-AAAA

Figure 8B : Blotting V5

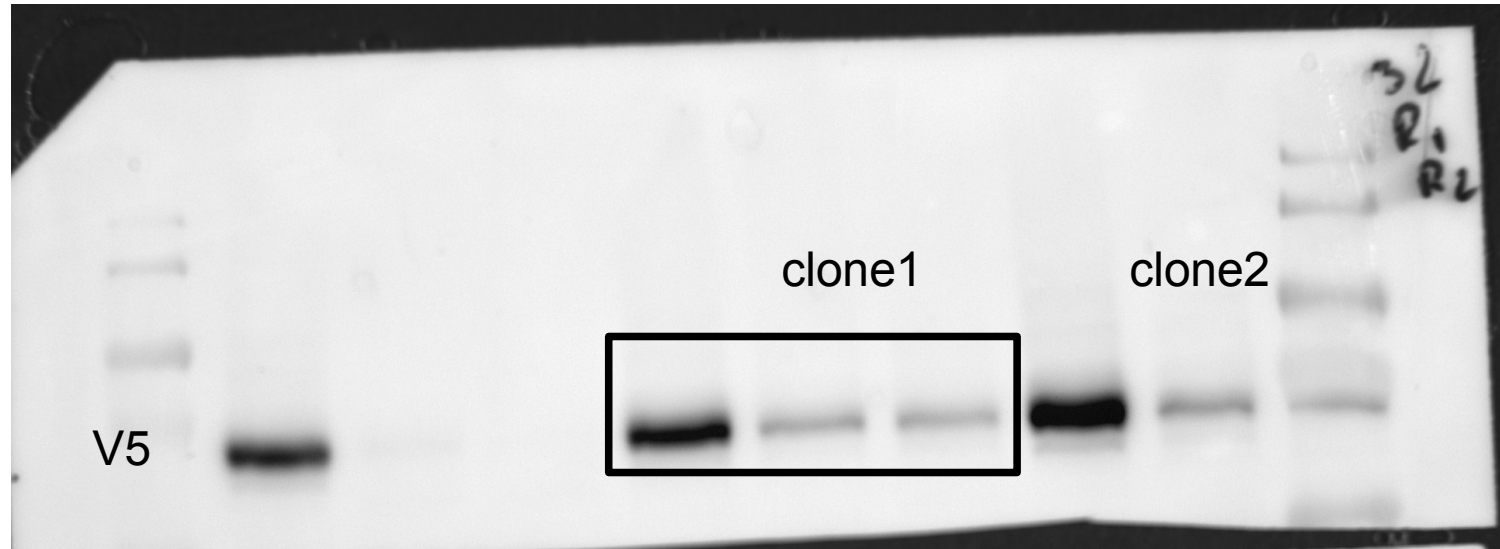

Figure 8B : Blotting Pgk1

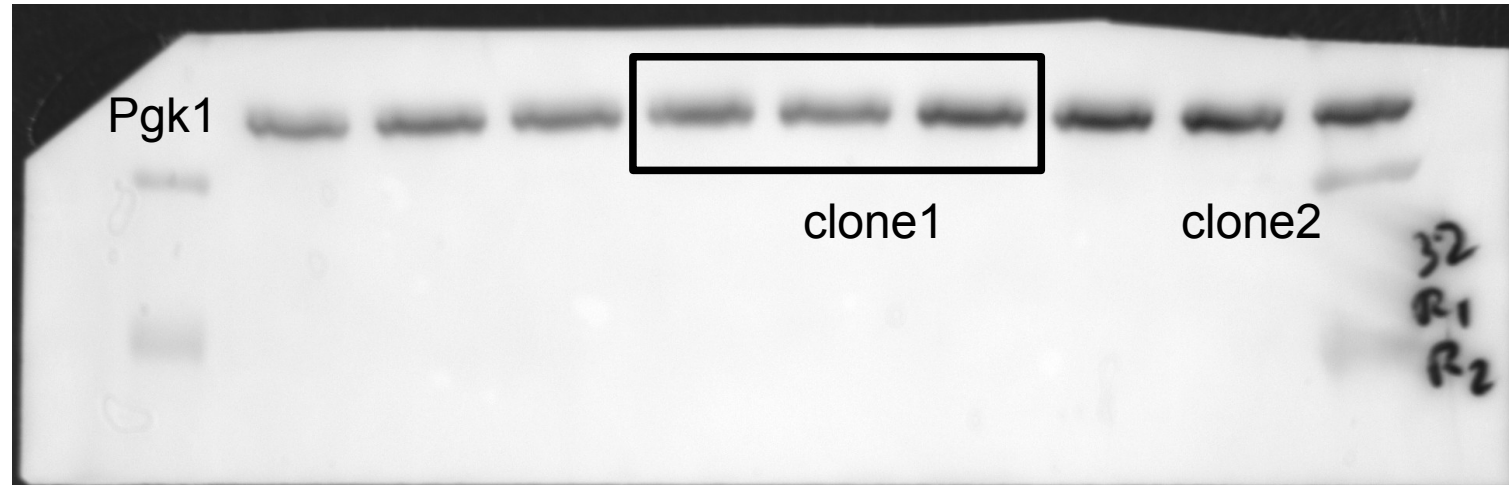

Figure 9A :  
Blotting GFP

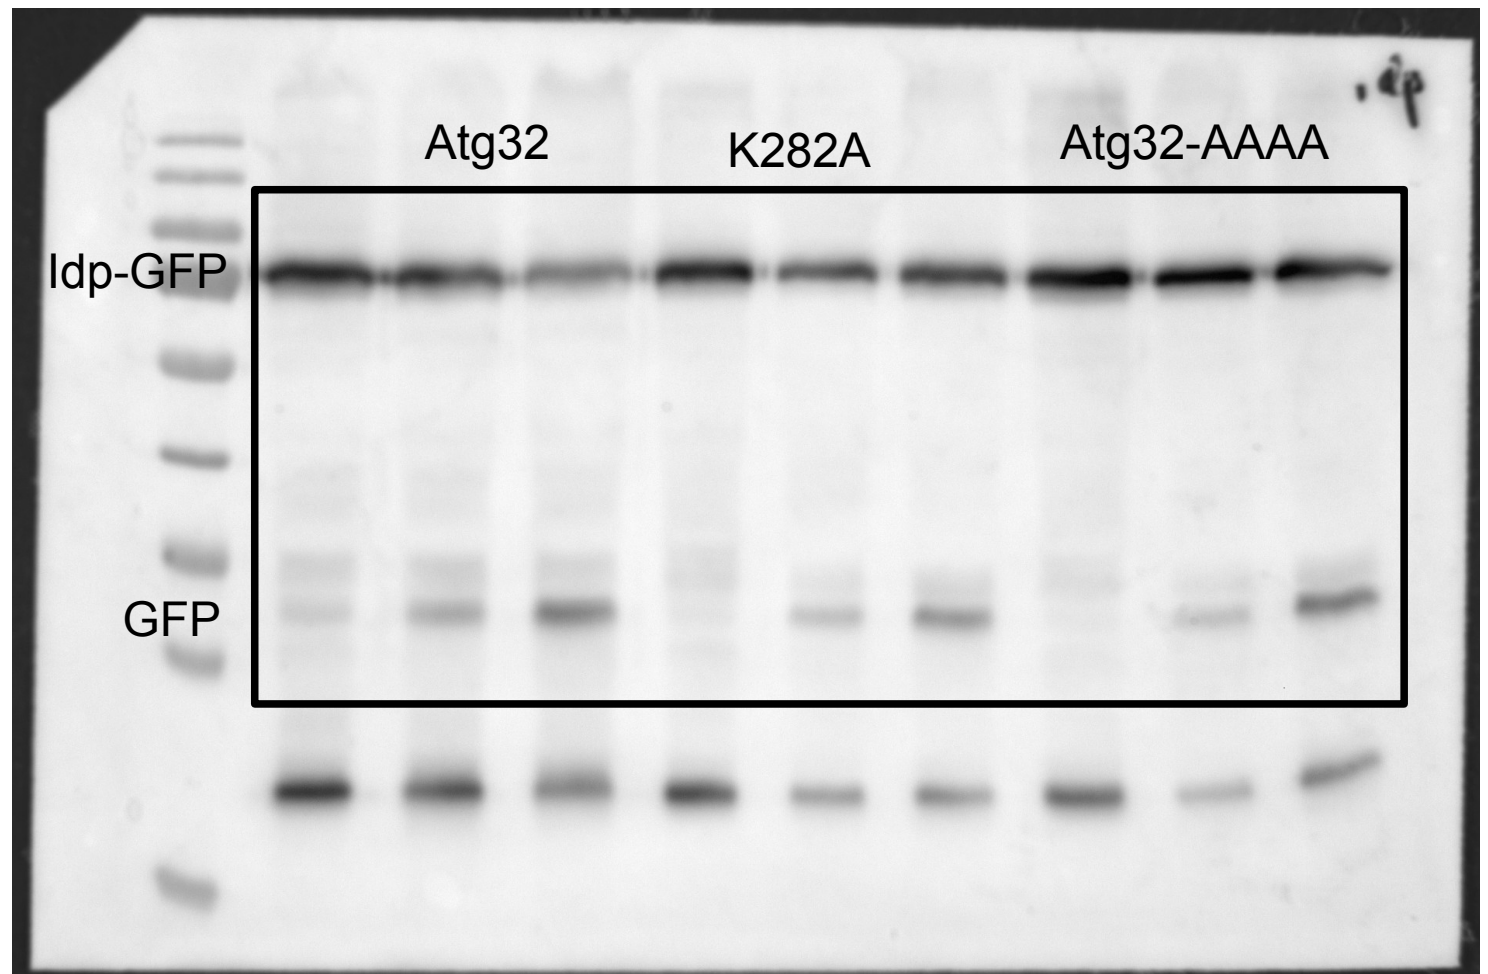

Figure 9A :  
Blotting Pgk1

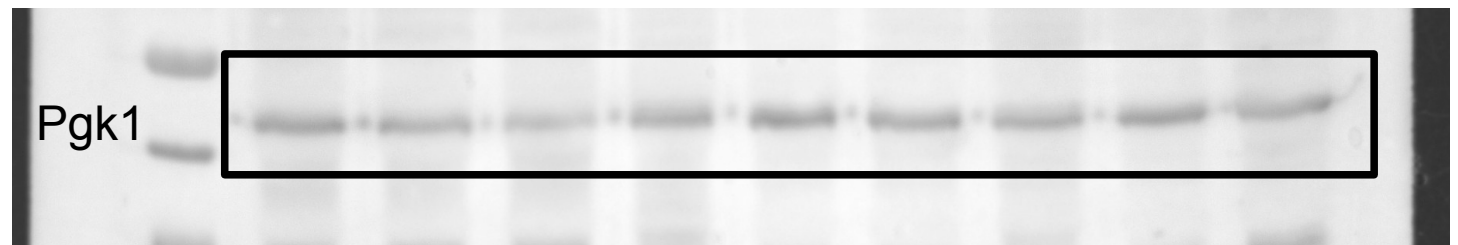

Figure S1A

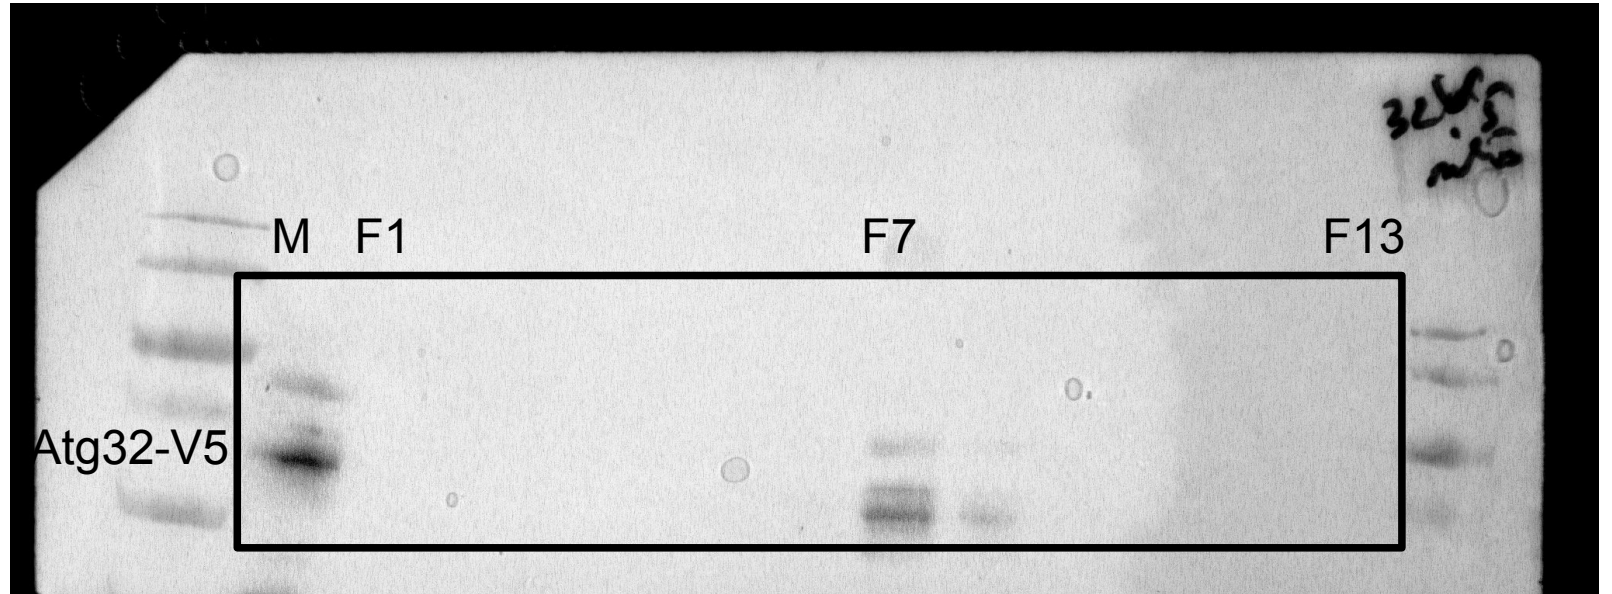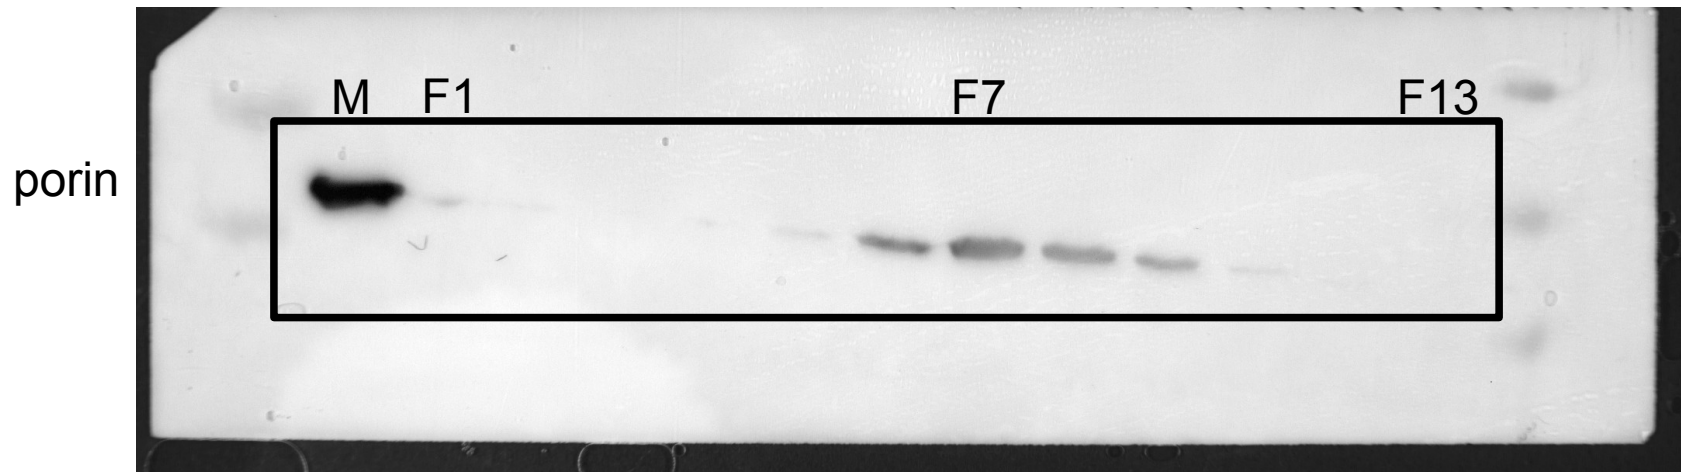

Figure S1B : GFP blotting

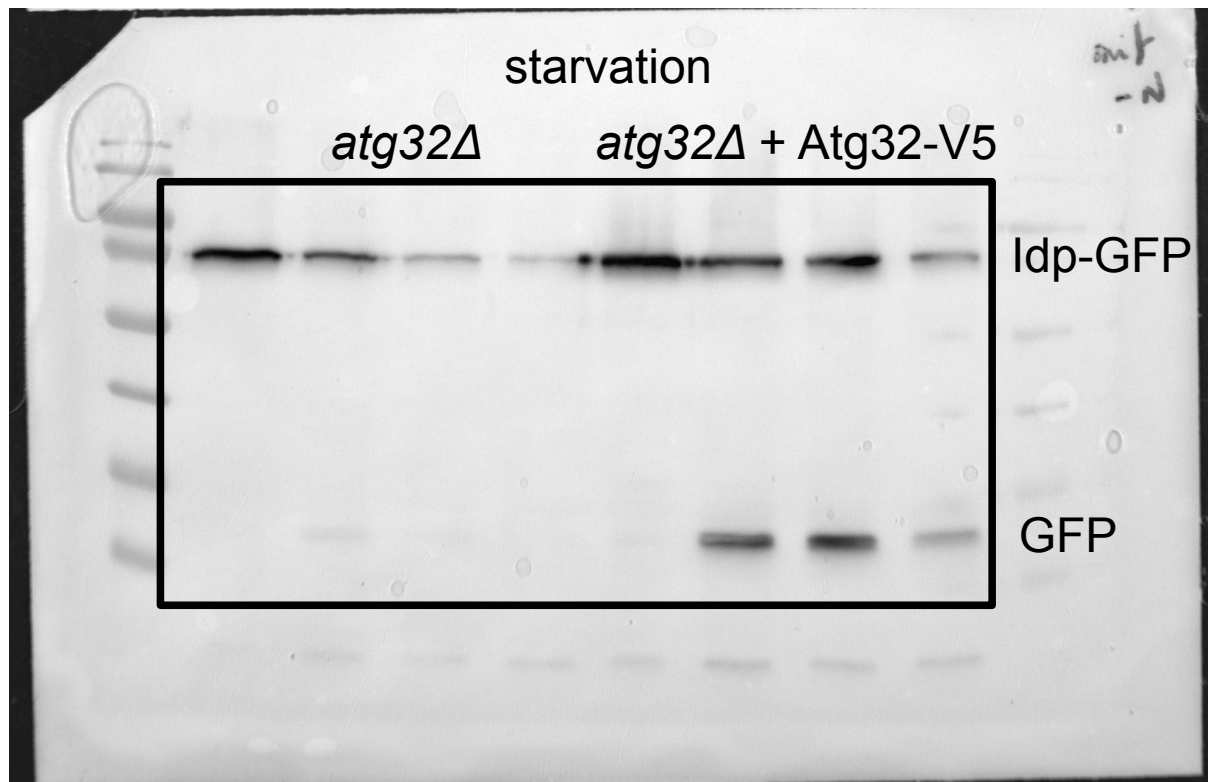

Figure S1B : Pgk1 blotting

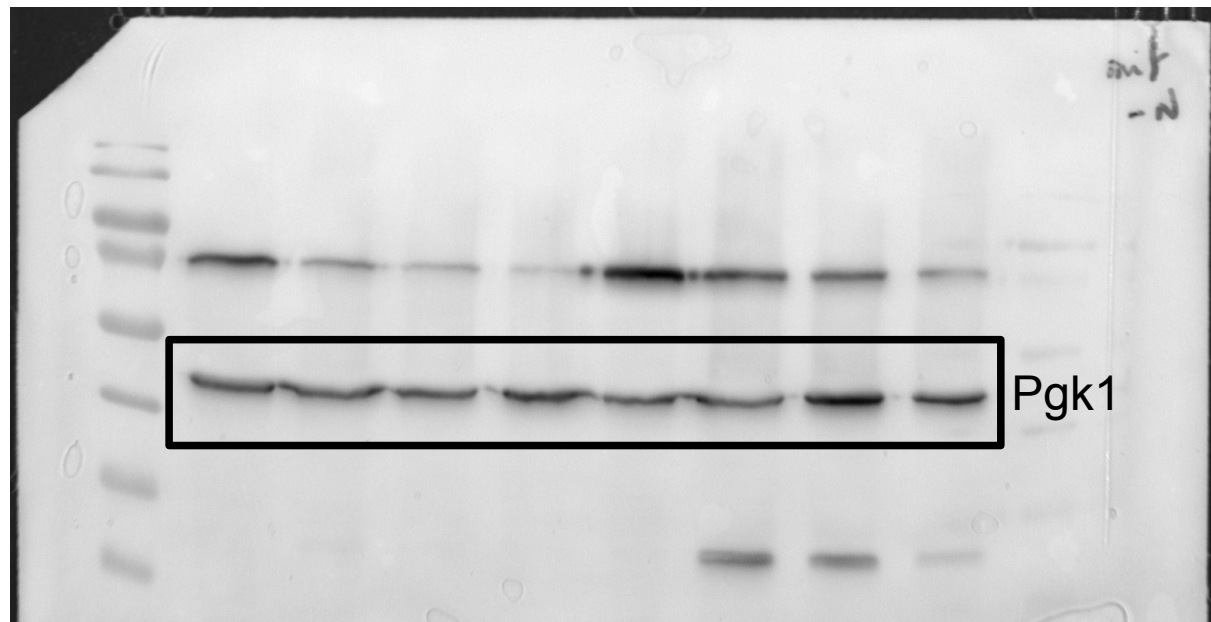

*atg32Δ* +Atg32-V5

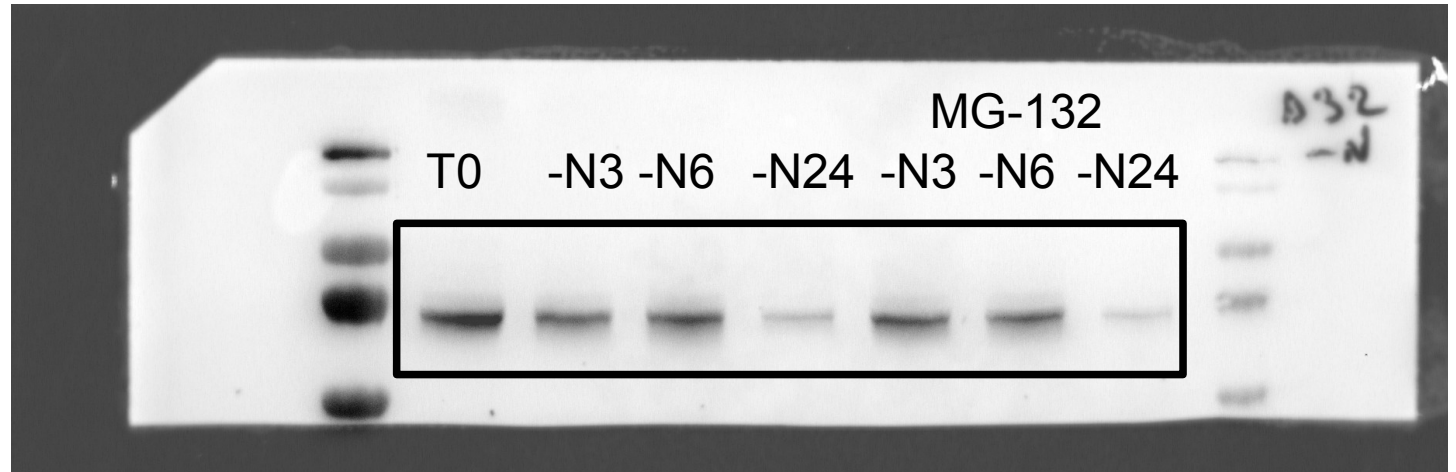

Figure S2A : V5 blotting

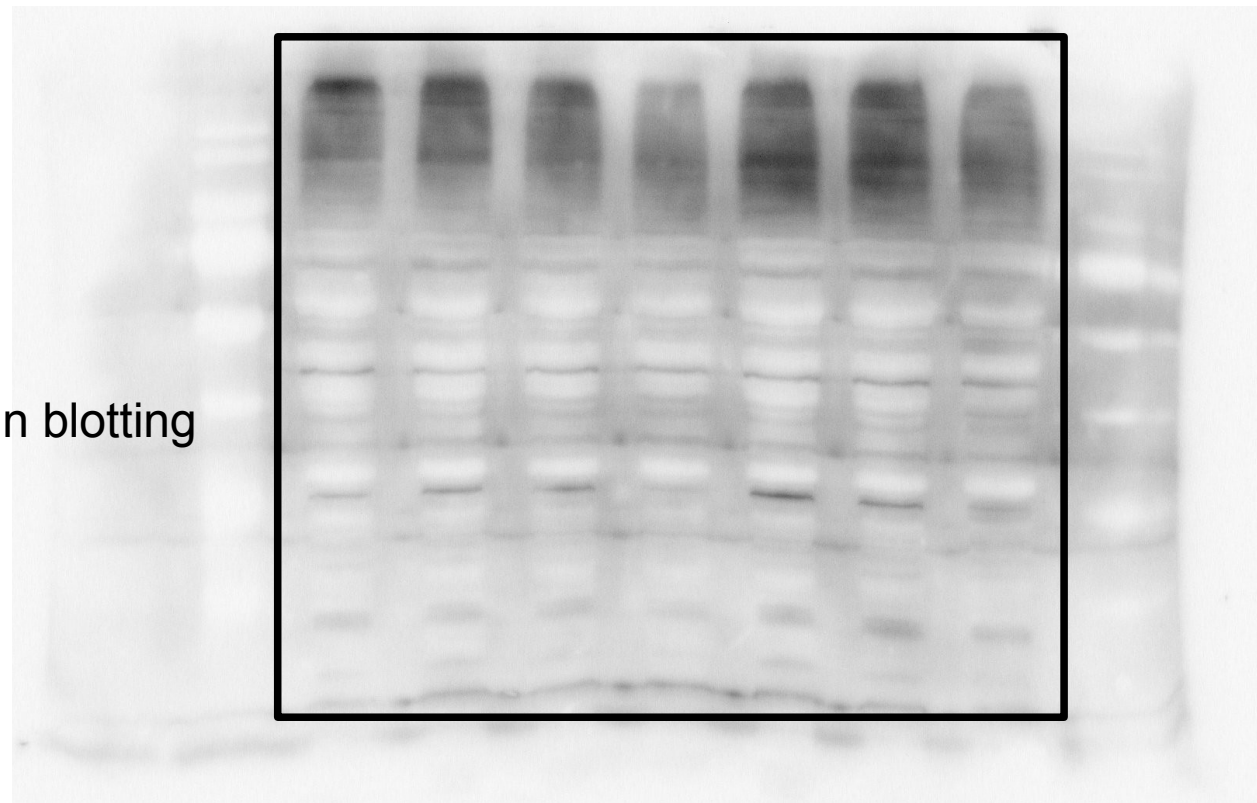

Figure S2A : Ubiquitin blotting



BY4742 +Atg32-V5

Figure S3 A : V5 blotting

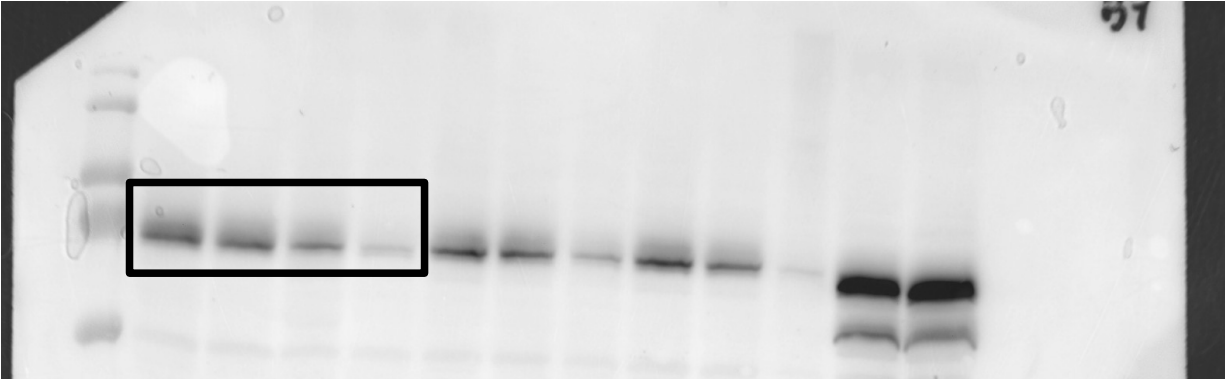

Figure S3 A : Pgk1 blotting

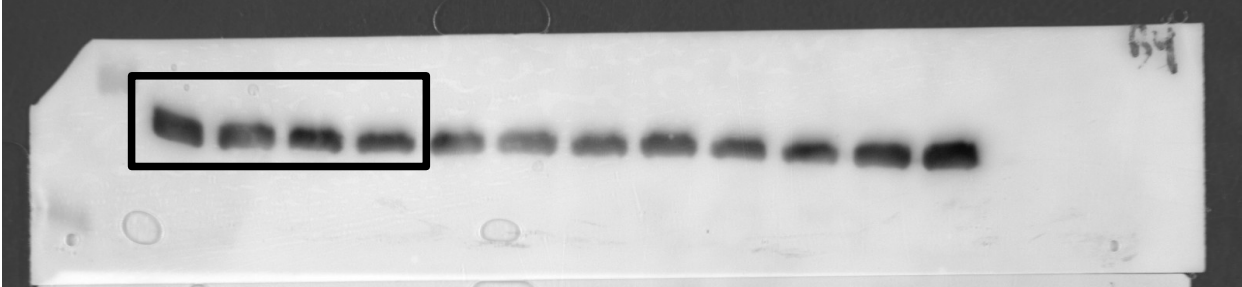



Figure S3 A : V5 blotting

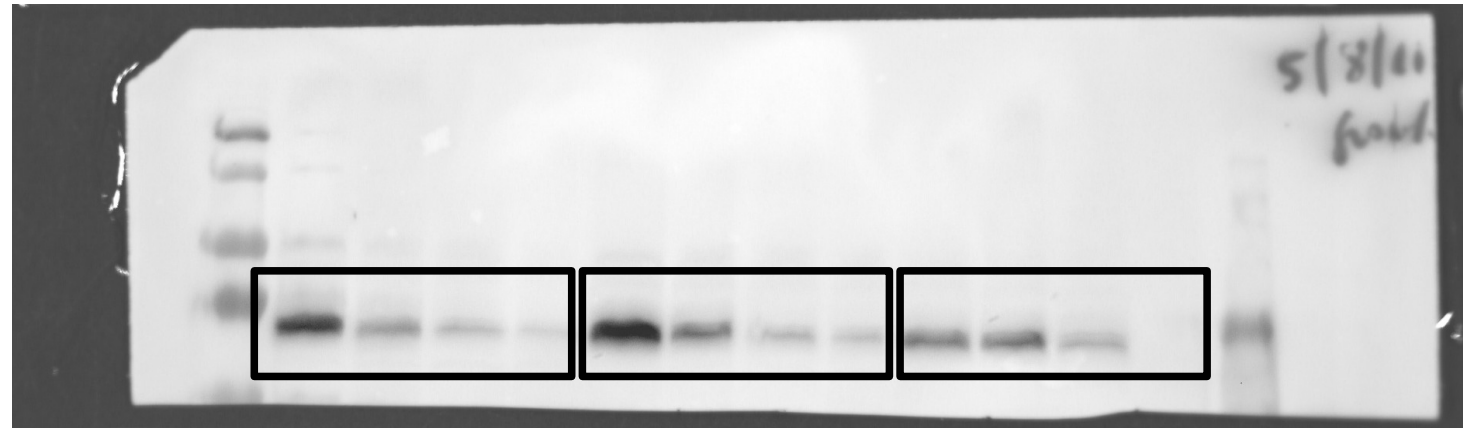

*atg5Δ*

*atg8Δ*

*atg11Δ*

Figure S3 A : Pgk1 blotting

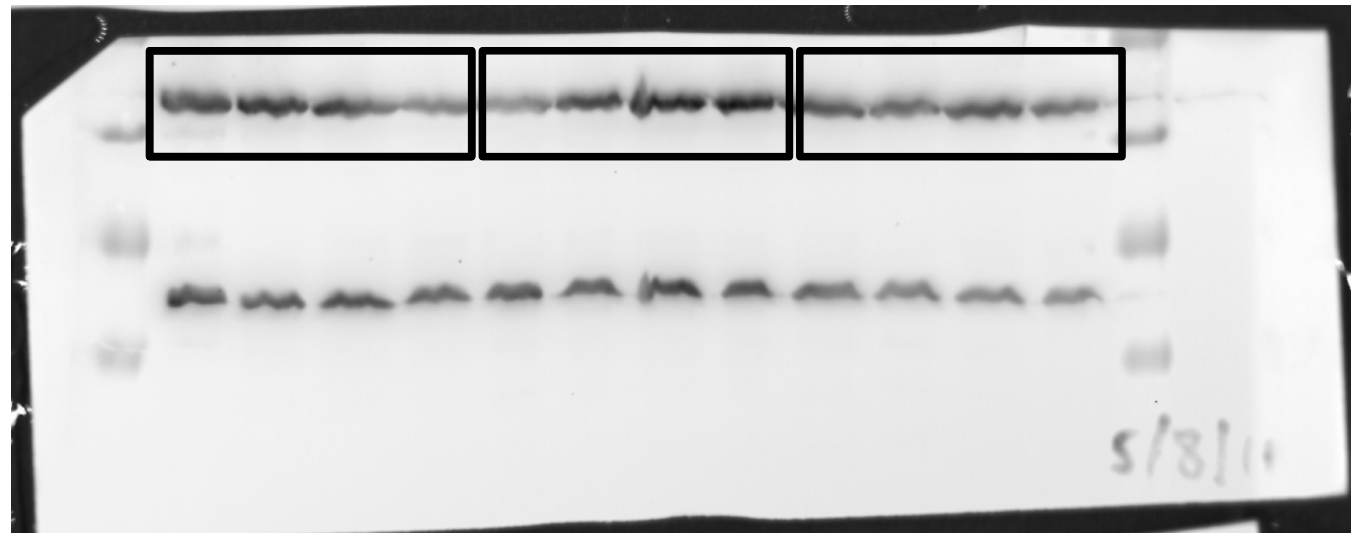

Figure S3 C : V5 blotting

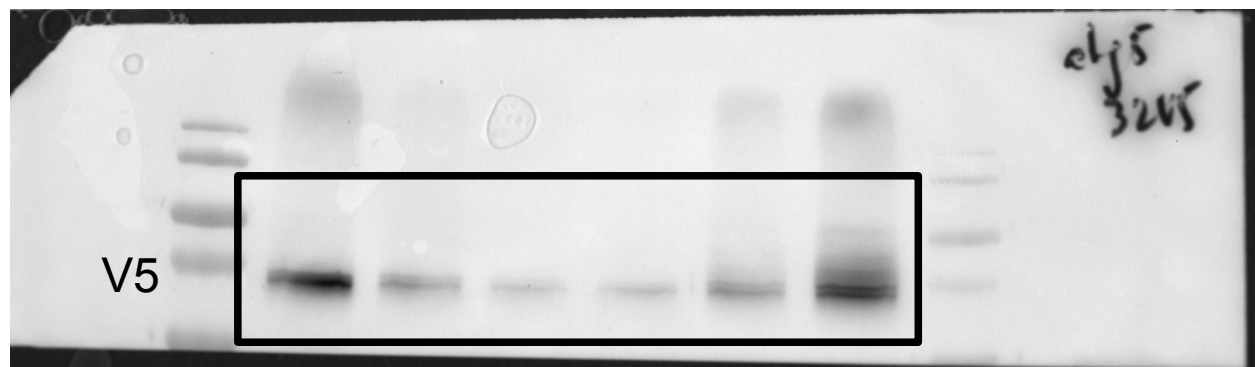

Figure S3 C : Pgk1 blotting

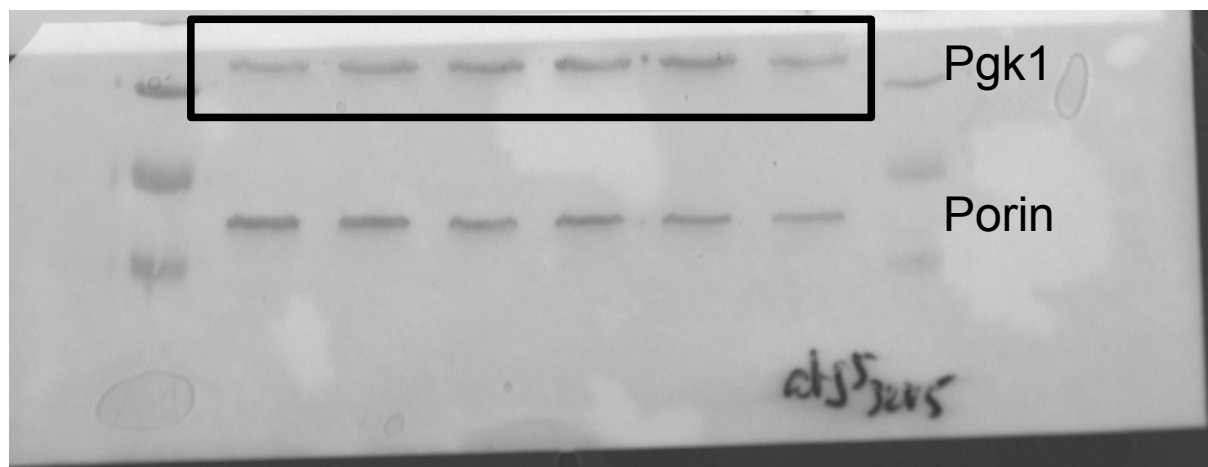

Figure S4A : V5 blotting

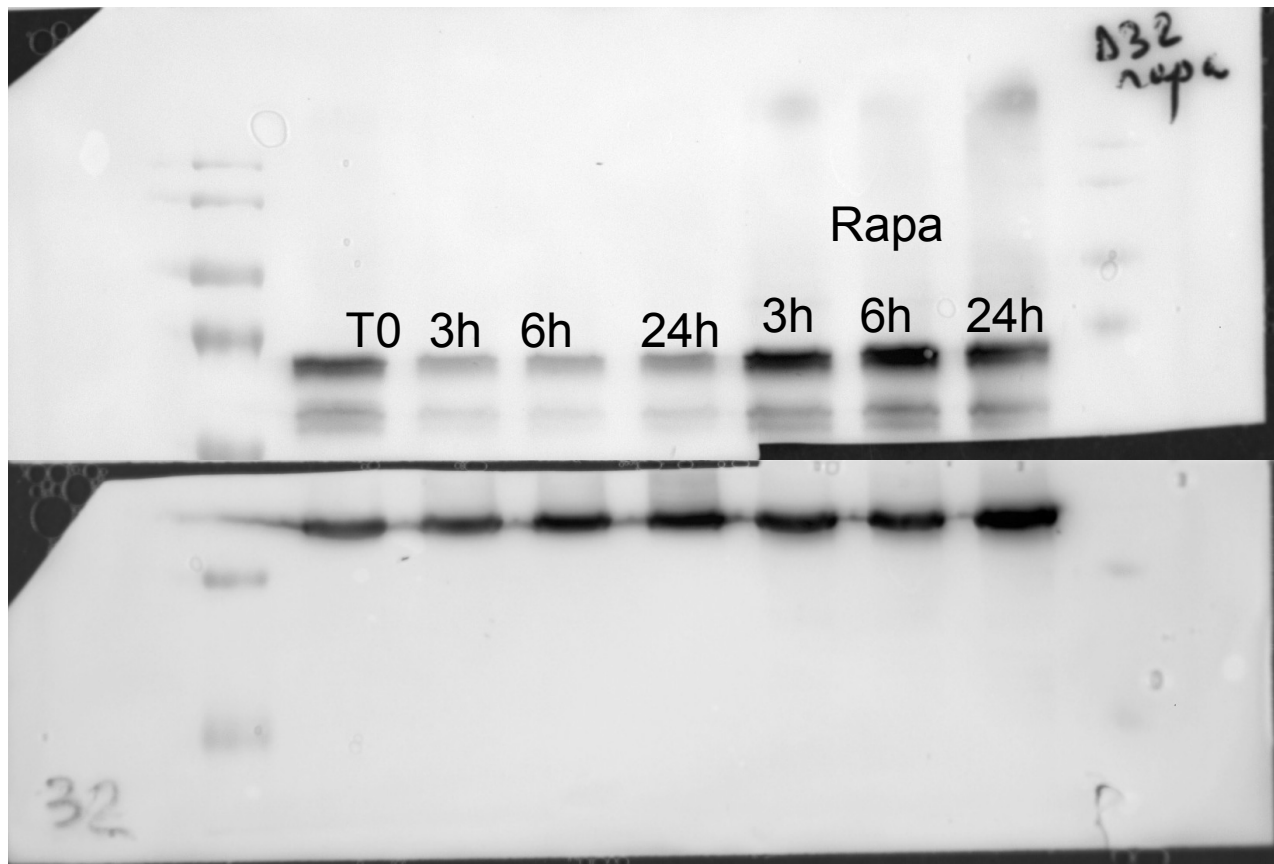

Figure S4A : Pgk1 blotting

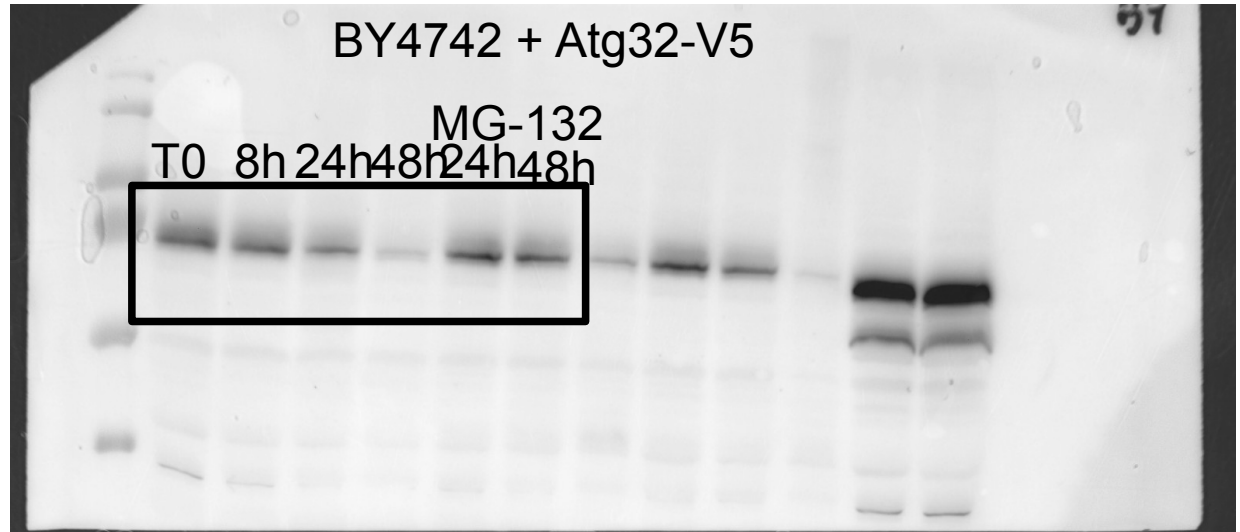

Figure S4B : V5 blotting

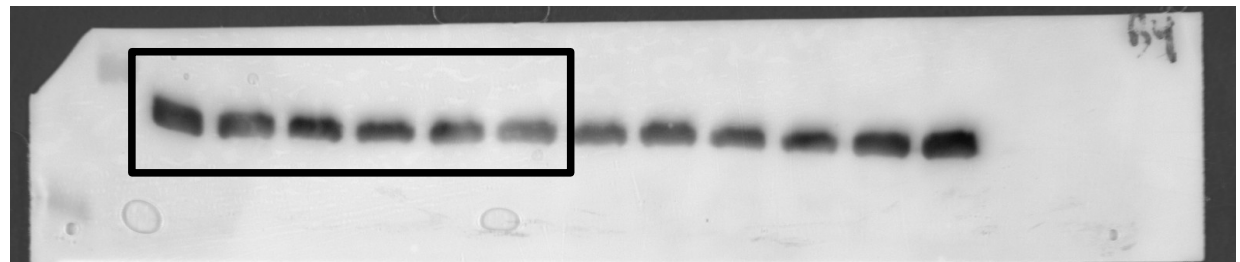

Figure S4B : Pgk1 blotting

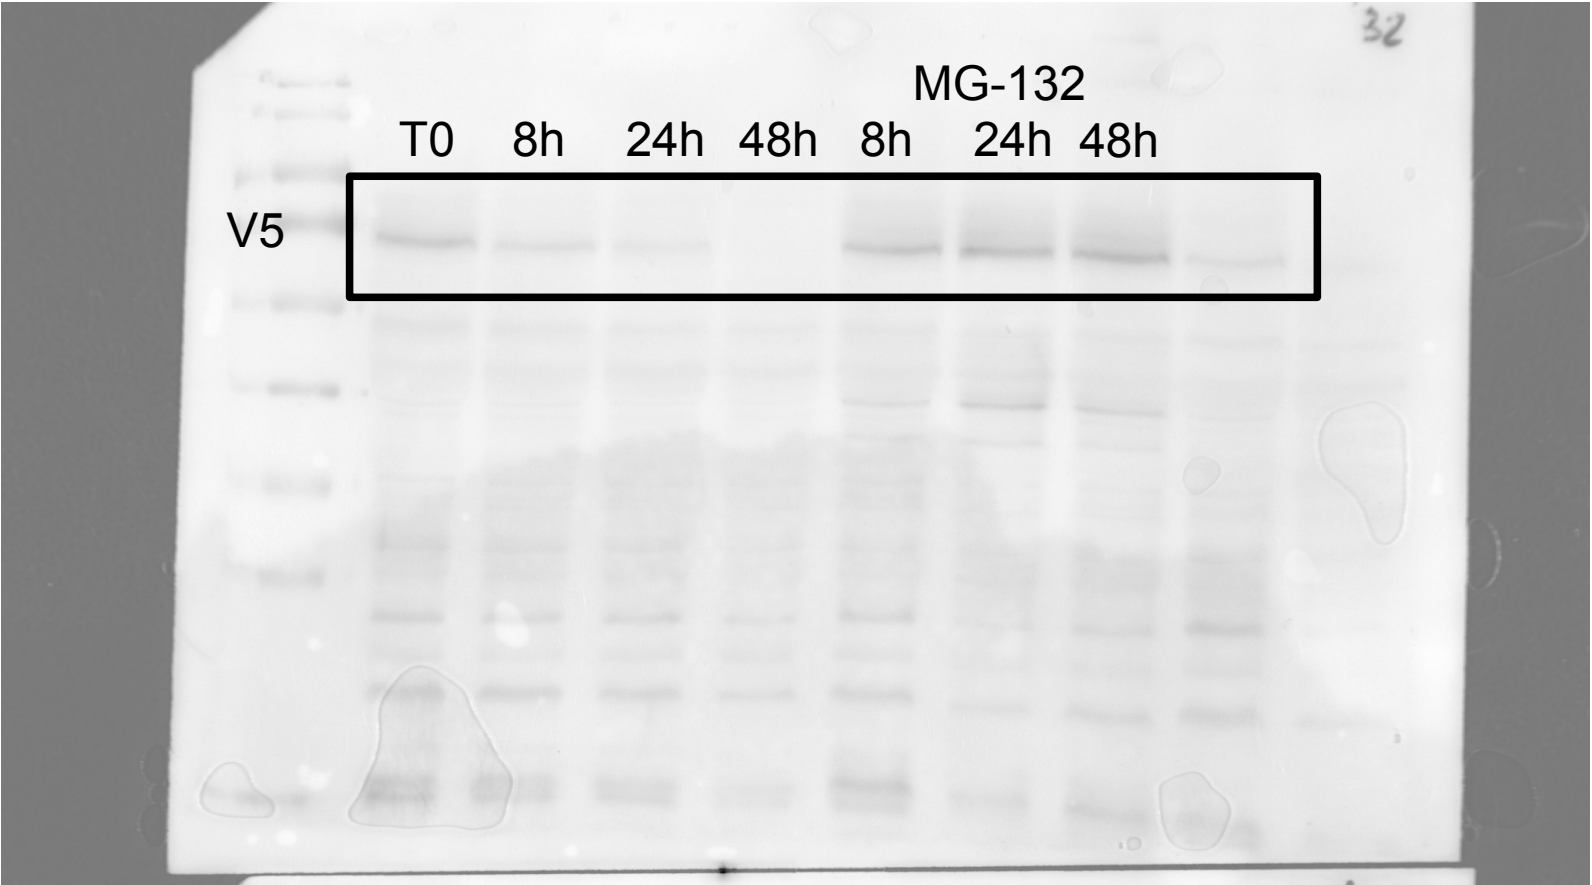

Figure S4D

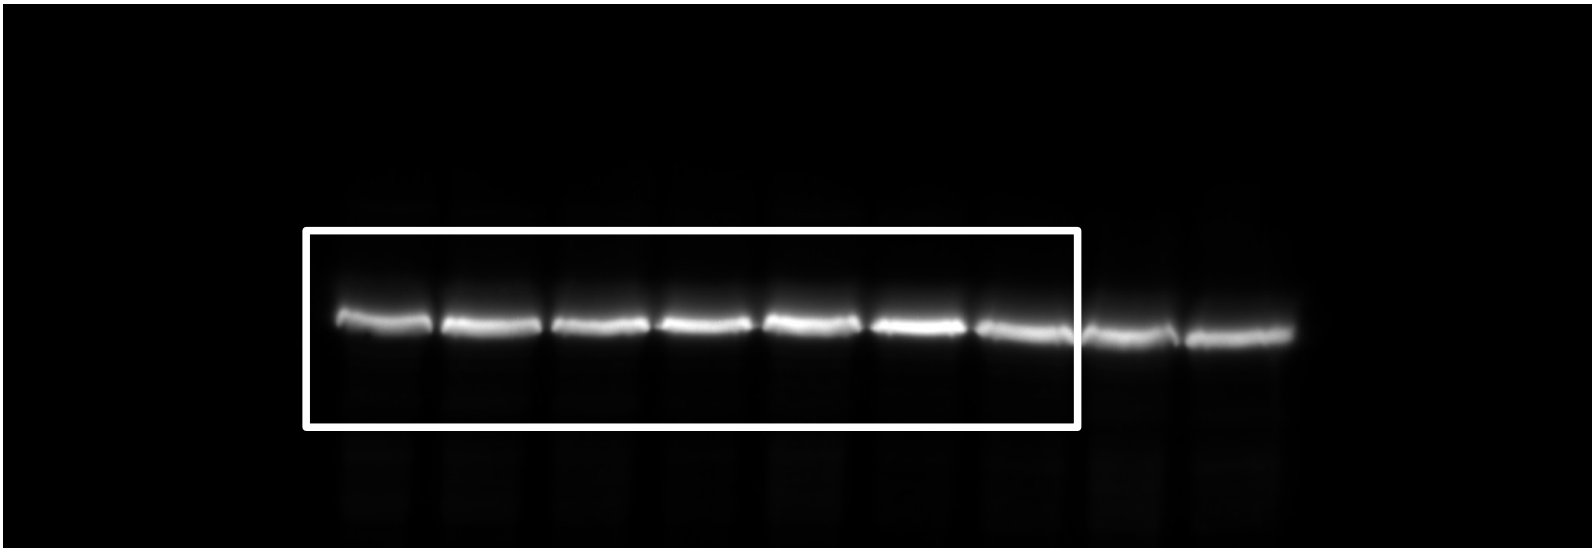

Atg32 $\Delta$  + Atg32-V5

MG-132 PMSF MG-132  
PMSF

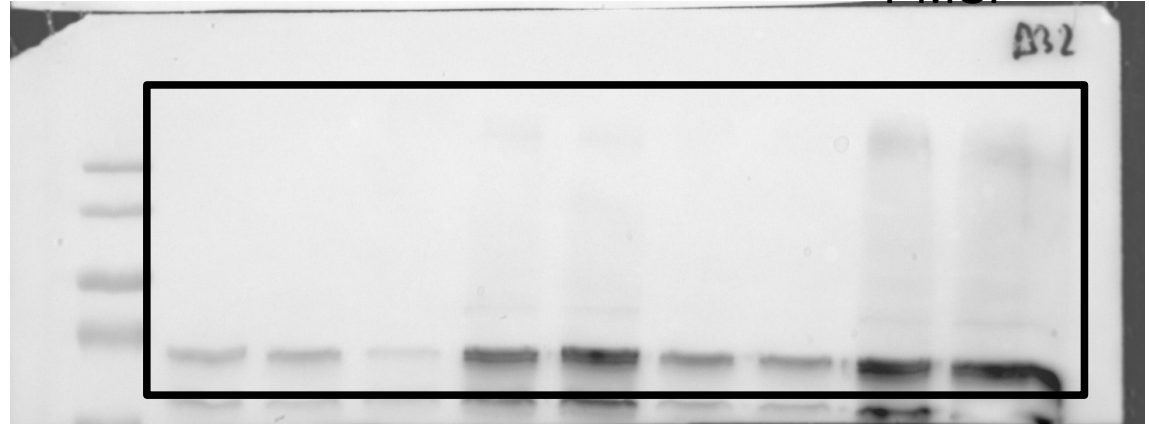

Figure S5B : V5 blotting

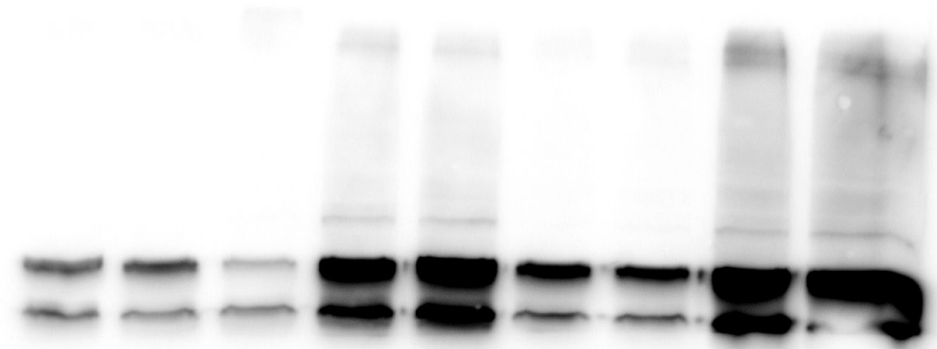

Figure S5B : Pgk1 blotting

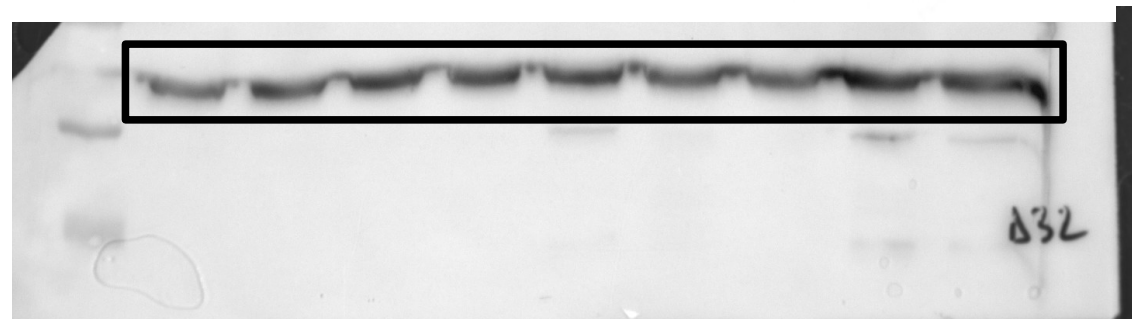

Figure S6 : GFP blotting

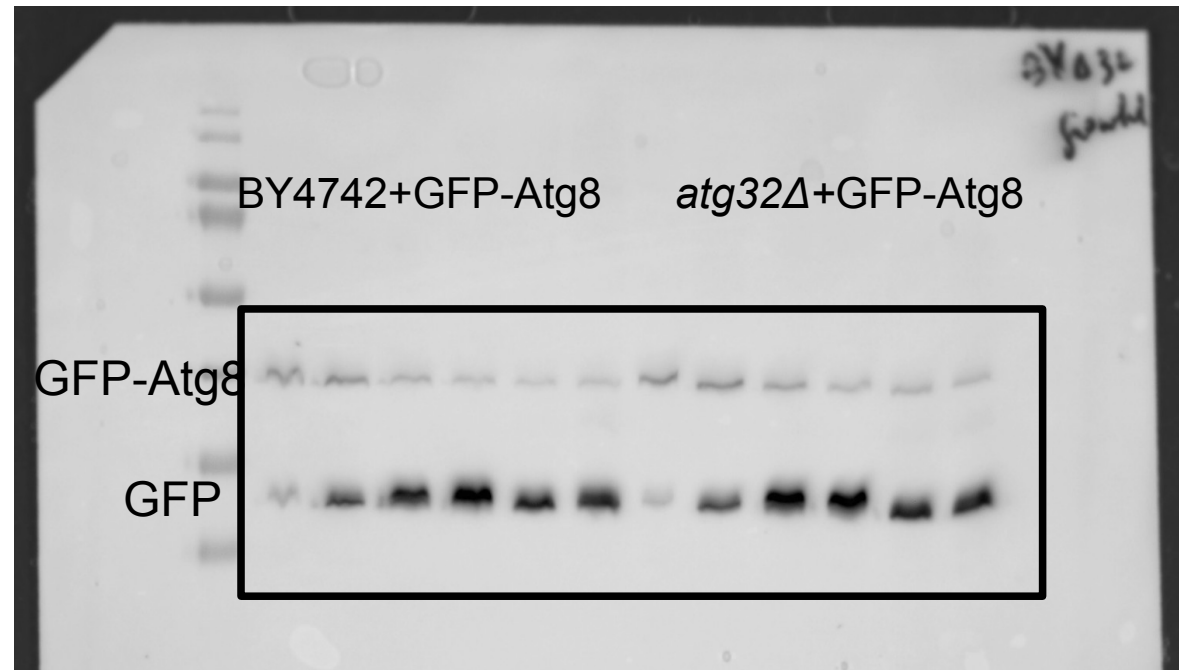

Figure S6 : Pgk1 blotting

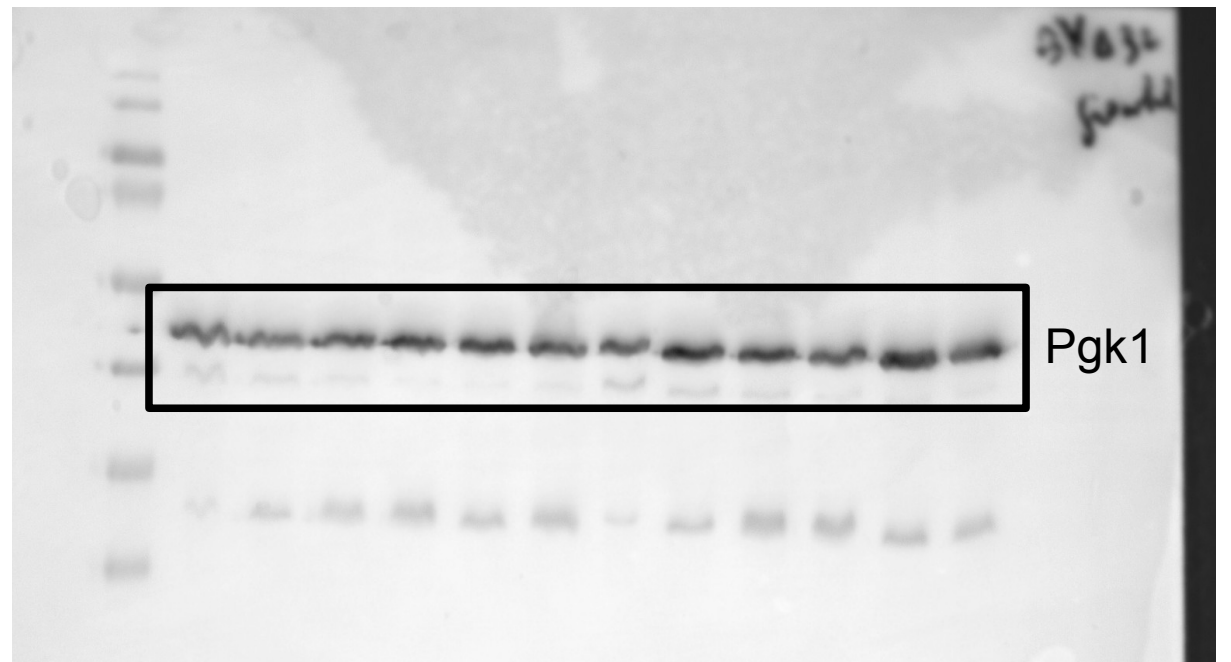

Figure S7

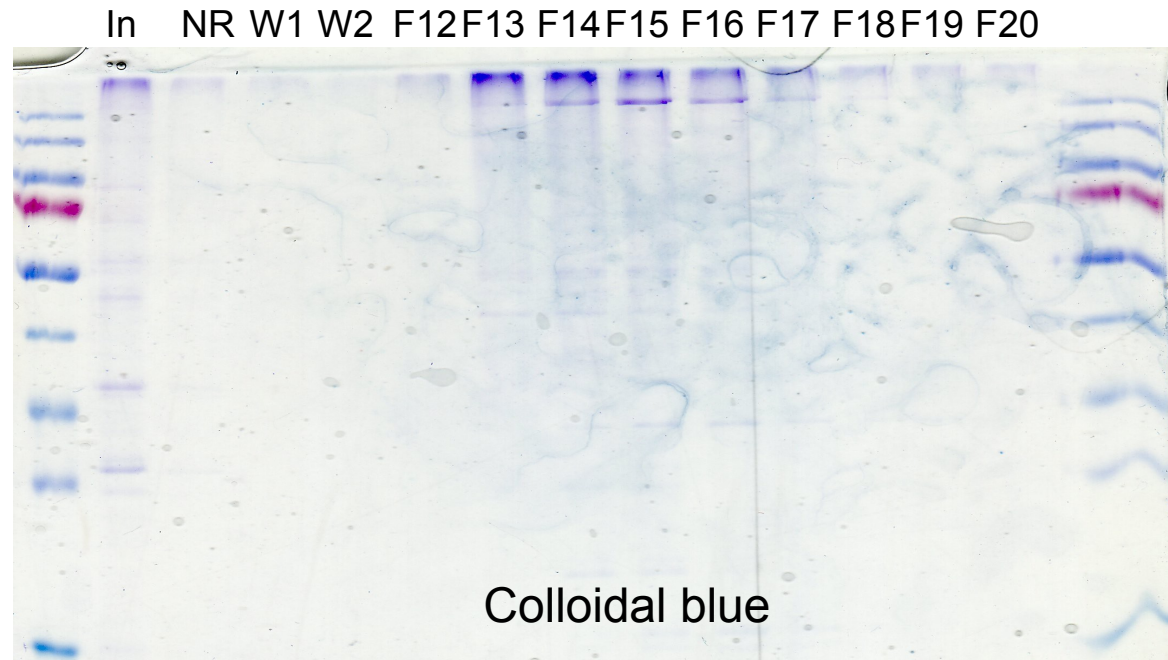

F15 F16

F15 F16

Histidine revelation

Ubiquitin revelation
